# Supplementary material for: An isomeric reaction benchmark set to test if the performance of state-of-the-art density functionals can be regarded as independent of the external potential
Source: Royal Society of Chemistry journal article supplement (doi:10.1039/c4cp00772g), 2014-01-01
Supplement: c4cp00772g1.pdf [file c4cp00772g1.pdf]

Electronic Supporting Information: An isomeric reaction  
benchmark set to test if the performance of state of the art  
density functionals can be regarded as independent of the  
external potential

Tobias Schwabe  
Center for Bioinformatics and Institute of Physical Chemistry  
University of Hamburg, Bundesstraße 43  
D-20146 Hamburg  
Germany  
schwabe@zbh.uni-hamburg.de

March 31, 2014

## List of Tables

|   |                                                                                             |    |
|---|---------------------------------------------------------------------------------------------|----|
| 1 | Comparison of Reference Energies and Energies including Relativistic Effects . . . . .      | 3  |
| 2 | Comparison of Reference Energies based on SCS-MP2 and MP2 . . . . .                         | 6  |
| 3 | Comparison of partial vs. full Frozen Core Treatment and corresponding basis sets . . . . . | 9  |
| 4 | Comparison between reference and SCSMP2/CBS plus CC correction energies . . . . .           | 11 |
| 5 | Study of higher order effects on reference results . . . . .                                | 14 |
| 6 | Complete set of isomerization energies for all methods in the test set (Part I) . . . . .   | 16 |
| 7 | Complete set of isomerization energies for all methods in the test set (Part II) . . . . .  | 19 |
| 8 | Contribution of dispersion correction to isomerization energies (Part I) . . . . .          | 22 |
| 9 | Contribution of dispersion correction to isomerization energies (Part II) . . . . .         | 25 |

## List of Figures

|   |                                                                                                                                                      |    |
|---|------------------------------------------------------------------------------------------------------------------------------------------------------|----|
| 1 | Relative change in deviations with respect to first row results for a given isomerization reaction set plotted for SCS-MP2 and B2GP-PLYP-D3. . . . . | 28 |
| 2 | Relative change in deviations with respect to first row results for a given isomerization reaction set plotted for $\omega$ B97X-D and M11. . . . .  | 29 |
| 3 | Relative change in deviations with respect to first row results for a given isomerization reaction set plotted for PW6B95-D3 and M06-2X. . . . .     | 30 |
| 4 | Relative change in deviations with respect to first row results for a given isomerization reaction set plotted for B3LYP-D3 and PBE0-D3. . . . .     | 31 |
| 5 | Relative change in deviations with respect to first row results for a given isomerization reaction set plotted for oTPSS-D3 and M11-L. . . . .       | 32 |

# 1 Analysis of Reference Data Accuracy

Table 1: Reference isomerization energies (ref) based on RI-SCS-MP2(pFC)/cc-p(wC)V5Z computations with CCSD(T)(pFC)/cc-p(wC)TZ corrections for higher correlation contributions in comparison to energies including relativistic corrections (RC) based on ZORA-PW6B95/def2-QZVPP results. Relativistic corrections only are also given. All values in kcal mol<sup>-1</sup>.

| ret   | ref    | ref + RC | RC    |
|-------|--------|----------|-------|
| C.01  | 5.90   | 5.97     | 0.07  |
| C.04  | 17.69  | 17.69    | -0.01 |
| C.05  | 3.76   | 3.77     | 0.01  |
| C.06  | 18.89  | 18.83    | -0.06 |
| C.07  | 45.14  | 45.19    | 0.05  |
| C.08  | 1.34   | 1.34     | 0.00  |
| C.10  | -9.09  | -9.18    | -0.09 |
| N.01  | 16.64  | 16.64    | 0.00  |
| N.02  | 17.88  | 17.96    | 0.08  |
| N.03  | -20.93 | -20.80   | 0.13  |
| N.04  | 12.30  | 12.29    | -0.01 |
| N.05  | -12.00 | -12.02   | -0.02 |
| N.06  | 32.03  | 31.96    | -0.07 |
| N.07  | 57.14  | 57.15    | 0.01  |
| N.08  | -14.16 | -14.24   | -0.08 |
| N.09  | -31.78 | -31.93   | -0.15 |
| O.01  | 15.75  | 15.75    | 0.00  |
| O.02  | 25.21  | 25.27    | 0.06  |
| O.03  | -63.68 | -63.58   | 0.10  |
| O.04  | 9.89   | 9.88     | -0.01 |
| O.05  | -12.35 | -12.37   | -0.02 |
| O.06  | 27.40  | 27.34    | -0.06 |
| O.07  | 58.80  | 58.84    | 0.04  |
| O.08  | 19.64  | 19.77    | 0.13  |
| O.09  | -11.53 | -11.59   | -0.06 |
| F.01  | 26.93  | 26.99    | 0.06  |
| F.02  | 0.96   | 0.97     | 0.01  |
| F.03  | -2.68  | -2.68    | 0.00  |
| Si.01 | 6.44   | 6.52     | 0.08  |
| Si.02 | -10.06 | -9.94    | 0.12  |
| Si.03 | -3.88  | -3.77    | 0.11  |

|       |        |        |       |
|-------|--------|--------|-------|
| Si.04 | 28.21  | 28.21  | 0.00  |
| Si.05 | 33.42  | 33.41  | -0.01 |
| Si.06 | 21.48  | 21.43  | -0.05 |
| Si.07 | 28.87  | 28.84  | -0.03 |
| Si.08 | 21.99  | 21.99  | 0.00  |
| Si.09 | -4.50  | -4.46  | 0.04  |
| Si.10 | 153.72 | 153.39 | -0.33 |
| P.01  | -4.94  | -4.97  | -0.03 |
| P.02  | -1.74  | -1.67  | 0.07  |
| P.03  | 22.95  | 23.22  | 0.27  |
| P.04  | 26.14  | 26.13  | -0.01 |
| P.05  | 10.77  | 10.72  | -0.05 |
| P.06  | 6.61   | 6.23   | -0.38 |
| P.07  | 35.33  | 35.29  | -0.04 |
| P.08  | -3.87  | -3.97  | -0.10 |
| P.09  | 17.87  | 17.60  | -0.27 |
| P.10  | 33.15  | 32.80  | -0.35 |
| S.01  | -2.59  | -2.64  | -0.05 |
| S.02  | -0.92  | -0.88  | 0.04  |
| S.03  | 6.57   | 6.66   | 0.09  |
| S.04  | 19.77  | 19.77  | 0.00  |
| S.05  | -1.16  | -1.19  | -0.03 |
| S.06  | 35.45  | 35.38  | -0.07 |
| S.07  | 47.08  | 47.06  | -0.02 |
| S.08  | 11.87  | 12.02  | 0.15  |
| S.09  | -3.02  | -3.09  | -0.07 |
| S.10  | -15.19 | -16.26 | -1.07 |
| Cl.01 | -3.29  | -3.11  | 0.18  |
| Cl.02 | 0.56   | 0.56   | 0.00  |
| Cl.03 | -1.64  | -1.63  | 0.01  |
| Ge.01 | 8.02   | 8.22   | 0.20  |
| Ge.02 | -7.38  | -6.48  | 0.90  |
| Ge.03 | 14.23  | 15.47  | 1.24  |
| Ge.04 | 26.73  | 26.58  | -0.15 |
| Ge.05 | 24.62  | 23.93  | -0.69 |
| Ge.06 | 19.65  | 19.62  | -0.03 |
| Ge.07 | 30.69  | 30.37  | -0.32 |
| Ge.08 | 19.07  | 18.59  | -0.48 |

|       |        |        |       |
|-------|--------|--------|-------|
| Ge.09 | -2.32  | -2.23  | 0.09  |
| Ge.10 | 93.48  | 88.99  | -4.49 |
| As.01 | -7.86  | -8.23  | -0.37 |
| As.02 | -5.71  | -5.54  | 0.17  |
| As.03 | 38.69  | 40.11  | 1.42  |
| As.04 | 27.23  | 27.09  | -0.14 |
| As.05 | 9.75   | 9.28   | -0.47 |
| As.06 | -4.78  | -6.59  | -1.81 |
| As.07 | 33.03  | 32.78  | -0.25 |
| As.08 | -4.18  | -4.71  | -0.53 |
| As.09 | -3.11  | -3.85  | -0.74 |
| As.10 | -2.91  | -6.02  | -3.11 |
| Se.01 | -6.77  | -7.13  | -0.36 |
| Se.02 | -5.13  | -5.13  | 0.00  |
| Se.03 | 15.99  | 16.23  | 0.24  |
| Se.04 | 20.83  | 20.75  | -0.08 |
| Se.05 | 0.04   | -0.17  | -0.21 |
| Se.06 | 32.84  | 32.68  | -0.16 |
| Se.07 | 43.35  | 43.15  | -0.20 |
| Se.08 | 10.72  | 10.98  | 0.26  |
| Se.09 | -2.86  | -3.19  | -0.33 |
| Se.10 | -68.86 | -76.50 | -7.64 |
| Br.01 | -6.26  | -5.62  | 0.64  |
| Br.02 | 0.06   | 0.04   | -0.02 |
| Br.03 | -1.63  | -1.61  | 0.02  |

---

Table 2: Reference isomerization energies based on RI-SCS-MP2(pFC)/cc-p(wC)V5Z computations with CCSD(T)(pFC)/cc-p(wC)TZ corrections for higher correlation contributions in comparison to RI-MP2(pFC)/cc-p(wC)V5Z with equal corrections (MP2+CC). Deviations are also given. All values in kcal mol<sup>-1</sup>.

| rct   | reference | MP2+CC | deviation |
|-------|-----------|--------|-----------|
| C.01  | 5.90      | 5.88   | -0.02     |
| C.04  | 17.69     | 17.70  | 0.01      |
| C.05  | 3.76      | 3.81   | 0.05      |
| C.06  | 18.89     | 18.88  | -0.01     |
| C.07  | 45.14     | 45.09  | -0.05     |
| C.08  | 1.34      | 1.29   | -0.05     |
| C.10  | -9.09     | -9.09  | 0.00      |
| N.01  | 16.64     | 16.60  | -0.04     |
| N.02  | 17.88     | 17.81  | -0.07     |
| N.03  | -20.93    | -20.84 | 0.09      |
| N.04  | 12.30     | 12.32  | 0.02      |
| N.05  | -12.00    | -11.92 | 0.08      |
| N.06  | 32.03     | 32.05  | 0.02      |
| N.07  | 57.14     | 57.09  | -0.05     |
| N.08  | -14.16    | -14.18 | -0.02     |
| N.09  | -31.78    | -31.70 | 0.08      |
| O.01  | 15.75     | 15.66  | -0.09     |
| O.02  | 25.21     | 25.10  | -0.11     |
| O.03  | -63.68    | -63.51 | 0.17      |
| O.04  | 9.89      | 9.95   | 0.06      |
| O.05  | -12.35    | -12.31 | 0.04      |
| O.06  | 27.40     | 27.43  | 0.03      |
| O.07  | 58.80     | 58.70  | -0.10     |
| O.08  | 19.64     | 19.51  | -0.13     |
| O.09  | -11.53    | -11.50 | 0.03      |
| F.01  | 26.93     | 26.83  | -0.10     |
| F.02  | 0.96      | 0.98   | 0.02      |
| F.03  | -2.68     | -2.68  | 0.00      |
| Si.01 | 6.44      | 6.41   | -0.03     |
| Si.02 | -10.06    | -10.04 | 0.02      |
| Si.03 | -3.88     | -3.91  | -0.03     |
| Si.04 | 28.21     | 28.20  | -0.01     |
| Si.05 | 33.42     | 33.31  | -0.11     |

|       |        |        |       |
|-------|--------|--------|-------|
| Si.06 | 21.48  | 21.45  | -0.03 |
| Si.07 | 28.87  | 28.77  | -0.10 |
| Si.08 | 21.99  | 21.92  | -0.07 |
| Si.09 | -4.50  | -4.45  | 0.05  |
| Si.10 | 153.72 | 153.45 | -0.27 |
| P.01  | -4.94  | -4.99  | -0.05 |
| P.02  | -1.74  | -1.78  | -0.04 |
| P.03  | 22.95  | 22.91  | -0.04 |
| P.04  | 26.14  | 26.14  | 0.00  |
| P.05  | 10.77  | 10.74  | -0.03 |
| P.06  | 6.61   | 6.65   | 0.04  |
| P.07  | 35.33  | 35.25  | -0.08 |
| P.08  | -3.87  | -3.92  | -0.05 |
| P.09  | 17.87  | 17.78  | -0.09 |
| P.10  | 33.15  | 32.98  | -0.17 |
| S.01  | -2.59  | -2.60  | -0.01 |
| S.02  | -0.92  | -0.99  | -0.07 |
| S.03  | 6.57   | 6.61   | 0.04  |
| S.04  | 19.77  | 19.78  | 0.01  |
| S.05  | -1.16  | -1.18  | -0.02 |
| S.06  | 35.45  | 35.46  | 0.01  |
| S.07  | 47.08  | 47.02  | -0.06 |
| S.08  | 11.87  | 11.77  | -0.10 |
| S.09  | -3.02  | -2.97  | 0.05  |
| S.10  | -15.19 | -15.03 | 0.16  |
| Cl.01 | -3.29  | -3.16  | 0.13  |
| Cl.02 | 0.56   | 0.61   | 0.05  |
| Cl.03 | -1.64  | -1.58  | 0.06  |
| Ge.01 | 8.02   | 7.98   | -0.04 |
| Ge.02 | -7.38  | -7.39  | -0.01 |
| Ge.03 | 14.23  | 14.20  | -0.03 |
| Ge.04 | 26.73  | 26.74  | 0.01  |
| Ge.05 | 24.62  | 24.58  | -0.04 |
| Ge.06 | 19.65  | 19.64  | -0.01 |
| Ge.07 | 30.69  | 30.57  | -0.12 |
| Ge.08 | 19.07  | 19.01  | -0.06 |
| Ge.09 | -2.32  | -2.29  | 0.03  |
| Ge.10 | 93.48  | 93.37  | -0.11 |

|       |        |        |       |
|-------|--------|--------|-------|
| As.01 | -7.86  | -7.91  | -0.05 |
| As.02 | -5.71  | -5.75  | -0.04 |
| As.03 | 38.69  | 38.65  | -0.04 |
| As.04 | 27.23  | 27.25  | 0.02  |
| As.05 | 9.75   | 9.74   | -0.01 |
| As.06 | -4.78  | -4.72  | 0.06  |
| As.07 | 33.03  | 32.93  | -0.10 |
| As.08 | -4.18  | -4.21  | -0.03 |
| As.09 | -3.11  | -3.10  | 0.01  |
| As.10 | -2.91  | -3.02  | -0.11 |
| Se.01 | -6.77  | -6.78  | -0.01 |
| Se.02 | -5.13  | -5.21  | -0.08 |
| Se.03 | 15.99  | 16.04  | 0.05  |
| Se.04 | 20.83  | 20.85  | 0.02  |
| Se.05 | 0.04   | 0.02   | -0.02 |
| Se.06 | 32.84  | 32.88  | 0.04  |
| Se.07 | 43.35  | 43.29  | -0.06 |
| Se.08 | 10.72  | 10.64  | -0.08 |
| Se.09 | -2.86  | -2.81  | 0.05  |
| Se.10 | -68.86 | -68.56 | 0.30  |
| Br.01 | -6.26  | -6.09  | 0.17  |
| Br.02 | 0.06   | 0.12   | 0.06  |
| Br.03 | -1.63  | -1.57  | 0.06  |

---



Table 3: Comparison of between cc-pVTZ and cc-p(wC)VTZ results at the HF and CCSD(T) level of theory. In the latter case, only a partial Frozen Core treatment is applied with cc-p(wC)VTZ. Given are the isomerization energies for all reactions containing 2nd and higher row atoms. Further, the deviation at the HF level ( $\Delta(\text{HF}) = E(\text{HF}/\text{cc-pVTZ}) - E(\text{HF}/\text{cc-p(wC)VTZ})$ ) and the additional deviation from the coupled cluster treatment ( $\Delta\Delta(\text{CC}) = \Delta(\text{CC}) - \Delta(\text{HF})$ ) are given.

| rect  | HF/<br>cc-p(wC)VTZ | HF/<br>cc-pVTZ | $\Delta(\text{HF})$ | CCSD(T)/<br>cc-p(wC)VTZ | CCSD(T)/<br>cc-pVTZ | $\Delta\Delta(\text{CC})$ |
|-------|--------------------|----------------|---------------------|-------------------------|---------------------|---------------------------|
| Si.01 | 13.70              | 13.84          | 0.14                | 6.91                    | 7.27                | 0.22                      |
| Si.02 | -11.28             | -11.02         | 0.26                | -9.62                   | -9.27               | 0.09                      |
| Si.03 | -16.22             | -14.53         | 1.69                | -4.40                   | -2.99               | -0.28                     |
| Si.04 | 26.31              | 26.22          | -0.09               | 27.79                   | 27.48               | -0.22                     |
| Si.05 | 29.07              | 28.53          | -0.54               | 32.33                   | 31.31               | -0.48                     |
| Si.06 | 14.60              | 14.45          | -0.15               | 21.06                   | 20.56               | -0.35                     |
| Si.07 | 42.48              | 42.65          | 0.17                | 29.27                   | 29.78               | 0.34                      |
| Si.08 | 30.40              | 30.30          | -0.10               | 21.88                   | 21.91               | 0.13                      |
| Si.09 | -13.49             | -13.35         | 0.14                | -3.77                   | -3.67               | -0.04                     |
| Si.10 | 149.78             | 144.49         | -5.29               | 149.16                  | 143.13              | -0.74                     |
| P.01  | 0.59               | 0.38           | -0.21               | -4.84                   | -4.87               | 0.18                      |
| P.02  | -0.64              | -0.73          | -0.09               | -1.42                   | -1.47               | 0.04                      |
| P.03  | 13.35              | 14.61          | 1.26                | 21.85                   | 22.91               | -0.20                     |
| P.04  | 24.57              | 24.59          | 0.02                | 25.66                   | 25.62               | -0.06                     |
| P.05  | 8.82               | 8.55           | -0.27               | 9.68                    | 9.24                | -0.17                     |
| P.06  | -7.66              | -8.04          | -0.38               | 5.17                    | 4.30                | -0.49                     |
| P.07  | 47.81              | 47.82          | 0.01                | 35.76                   | 35.88               | 0.11                      |
| P.08  | 0.99               | 0.84           | -0.15               | -4.18                   | -4.15               | 0.18                      |
| P.09  | 18.03              | 18.07          | 0.04                | 16.68                   | 16.87               | 0.15                      |
| P.10  | 30.36              | 26.03          | -4.33               | 31.65                   | 27.00               | -0.32                     |
| S.01  | 0.47               | 0.16           | -0.31               | -2.51                   | -2.67               | 0.15                      |
| S.02  | 0.92               | 0.81           | -0.11               | -0.48                   | -0.55               | 0.04                      |
| S.03  | 5.10               | 4.84           | -0.26               | 5.28                    | 4.84                | -0.18                     |
| S.04  | 18.53              | 18.55          | 0.02                | 19.19                   | 19.11               | -0.10                     |
| S.05  | -1.59              | -1.69          | -0.10               | -1.67                   | -1.84               | -0.07                     |
| S.06  | 26.84              | 26.46          | -0.38               | 34.64                   | 34.06               | -0.20                     |
| S.07  | 59.13              | 58.89          | -0.24               | 47.58                   | 47.42               | 0.08                      |
| S.08  | 14.74              | 14.69          | -0.05               | 12.33                   | 12.27               | -0.01                     |
| S.09  | -2.54              | -2.81          | -0.27               | -3.15                   | -3.29               | 0.13                      |
| S.10  | -10.93             | -27.88         | -16.95              | -16.34                  | -34.78              | -1.49                     |
| Cl.01 | -9.11              | -9.22          | -0.11               | -3.35                   | -3.56               | -0.10                     |

|       |        |        |       |        |        |       |
|-------|--------|--------|-------|--------|--------|-------|
| Cl.02 | -0.24  | -0.28  | -0.04 | 0.36   | 0.30   | -0.02 |
| Cl.03 | -2.95  | -3.01  | -0.06 | -1.66  | -1.73  | -0.01 |
| Ge.01 | 16.46  | 16.48  | 0.02  | 8.46   | 9.47   | 0.99  |
| Ge.02 | -9.03  | -9.13  | -0.10 | -7.03  | -7.83  | -0.70 |
| Ge.03 | 3.71   | 4.11   | 0.40  | 13.16  | 8.54   | -5.02 |
| Ge.04 | 24.39  | 24.40  | 0.01  | 26.37  | 26.05  | -0.33 |
| Ge.05 | 20.68  | 20.71  | 0.03  | 23.76  | 23.55  | -0.24 |
| Ge.06 | 11.83  | 11.82  | -0.01 | 19.39  | 19.53  | 0.15  |
| Ge.07 | 44.59  | 44.54  | -0.05 | 31.09  | 31.90  | 0.86  |
| Ge.08 | 29.03  | 29.09  | 0.06  | 18.96  | 20.78  | 1.76  |
| Ge.09 | -9.99  | -10.01 | -0.02 | -1.53  | -1.59  | -0.04 |
| Ge.10 | 90.67  | 88.38  | -2.29 | 89.02  | 87.34  | 0.61  |
| As.01 | -1.39  | -1.44  | -0.05 | -7.65  | -6.69  | 1.01  |
| As.02 | -5.33  | -5.36  | -0.03 | -5.44  | -5.48  | -0.01 |
| As.03 | 29.70  | 30.11  | 0.41  | 37.37  | 33.70  | -4.08 |
| As.04 | 25.13  | 25.16  | 0.03  | 26.86  | 26.65  | -0.24 |
| As.05 | 7.67   | 7.66   | -0.01 | 9.00   | 8.58   | -0.41 |
| As.06 | -20.02 | -20.00 | 0.02  | -6.11  | -5.32  | 0.77  |
| As.07 | 46.15  | 46.08  | -0.07 | 33.37  | 33.81  | 0.51  |
| As.08 | 1.96   | 1.90   | -0.06 | -4.37  | -3.28  | 1.15  |
| As.09 | -7.16  | -7.27  | -0.11 | -2.98  | -1.66  | 1.43  |
| As.10 | -7.54  | -7.83  | -0.29 | -4.09  | -2.33  | 2.05  |
| Se.01 | -3.04  | -3.13  | -0.09 | -6.62  | -5.88  | 0.83  |
| Se.02 | -4.27  | -4.30  | -0.03 | -4.75  | -4.83  | -0.05 |
| Se.03 | 15.63  | 15.68  | 0.05  | 14.77  | 13.59  | -1.23 |
| Se.04 | 18.83  | 18.88  | 0.05  | 20.36  | 20.15  | -0.26 |
| Se.05 | -0.56  | -0.56  | 0.00  | -0.36  | -0.66  | -0.30 |
| Se.06 | 22.86  | 22.90  | 0.04  | 32.25  | 32.52  | 0.23  |
| Se.07 | 56.26  | 56.14  | -0.12 | 43.67  | 44.02  | 0.47  |
| Se.08 | 13.52  | 13.52  | 0.00  | 11.09  | 10.96  | -0.13 |
| Se.09 | -1.10  | -1.18  | -0.08 | -2.92  | -2.09  | 0.91  |
| Se.10 | -71.67 | -74.03 | -2.36 | -69.68 | -68.25 | 3.79  |
| Br.01 | -13.08 | -13.11 | -0.03 | -6.35  | -6.61  | -0.23 |
| Br.02 | -1.11  | -1.13  | -0.02 | -0.16  | -0.23  | -0.05 |
| Br.03 | -3.38  | -3.40  | -0.02 | -1.72  | -1.78  | -0.04 |

---

Table 4: Reference isomerization energies based on RI-SCS-MP2(pFC)/cc-p(wC)V5Z computations with CCSD(T)(pFC)/cc-p(wC)TZ corrections for higher correlation contributions in comparison to RI-SCS-MP2(pFC) results at the complete basis set limit with equal corrections (SCSMP2/CBS+CC). For the extrapolation results from SCSMP2/cc-p(wC)VQZ and SCSMP2/cc-p(wC)V5Z are used as explained elsewhere.[?] Deviations are also given. All values in kcal mol<sup>-1</sup>.

| rect  | reference | SCSMP2/CBS+CC | deviation |
|-------|-----------|---------------|-----------|
| C.01  | 5.90      | 5.77          | -0.13     |
| C.04  | 17.69     | 17.71         | 0.02      |
| C.05  | 3.76      | 3.74          | -0.02     |
| C.06  | 18.89     | 19.03         | 0.14      |
| C.07  | 45.14     | 44.97         | -0.17     |
| C.08  | 1.34      | 1.43          | 0.09      |
| C.10  | -9.09     | -8.92         | 0.17      |
| N.01  | 16.64     | 16.61         | -0.03     |
| N.02  | 17.88     | 17.68         | -0.20     |
| N.03  | -20.93    | -21.24        | -0.31     |
| N.04  | 12.30     | 12.29         | -0.01     |
| N.05  | -12.00    | -12.10        | -0.10     |
| N.06  | 32.03     | 32.06         | 0.03      |
| N.07  | 57.14     | 57.04         | -0.10     |
| N.08  | -14.16    | -13.97        | 0.19      |
| N.09  | -31.78    | -31.46        | 0.32      |
| O.01  | 15.75     | 15.69         | -0.06     |
| O.02  | 25.21     | 25.02         | -0.19     |
| O.03  | -63.68    | -63.94        | -0.26     |
| O.04  | 9.89      | 9.86          | -0.03     |
| O.05  | -12.35    | -12.45        | -0.10     |
| O.06  | 27.40     | 27.42         | 0.02      |
| O.07  | 58.80     | 58.63         | -0.17     |
| O.08  | 19.64     | 19.49         | -0.15     |
| O.09  | -11.53    | -11.47        | 0.06      |
| F.01  | 26.93     | 26.78         | -0.15     |
| F.02  | 0.96      | 0.94          | -0.02     |
| F.03  | -2.68     | -2.74         | -0.06     |
| Si.01 | 6.44      | 6.12          | -0.32     |
| Si.02 | -10.06    | -10.31        | -0.25     |
| Si.03 | -3.88     | -3.52         | 0.36      |
| Si.04 | 28.21     | 28.40         | 0.19      |

|       |        |        |       |
|-------|--------|--------|-------|
| Si.05 | 33.42  | 33.88  | 0.46  |
| Si.06 | 21.48  | 21.76  | 0.28  |
| Si.07 | 28.87  | 28.49  | -0.38 |
| Si.08 | 21.99  | 21.96  | -0.03 |
| Si.09 | -4.50  | -4.67  | -0.17 |
| Si.10 | 153.72 | 154.62 | 0.90  |
| P.01  | -4.94  | -5.14  | -0.20 |
| P.02  | -1.74  | -1.95  | -0.21 |
| P.03  | 22.95  | 23.40  | 0.45  |
| P.04  | 26.14  | 26.31  | 0.17  |
| P.05  | 10.77  | 11.14  | 0.37  |
| P.06  | 6.61   | 7.05   | 0.44  |
| P.07  | 35.33  | 34.98  | -0.35 |
| P.08  | -3.87  | -3.83  | 0.04  |
| P.09  | 17.87  | 18.37  | 0.50  |
| P.10  | 33.15  | 33.57  | 0.42  |
| S.01  | -2.59  | -2.81  | -0.22 |
| S.02  | -0.92  | -1.10  | -0.18 |
| S.03  | 6.57   | 7.07   | 0.50  |
| S.04  | 19.77  | 19.97  | 0.20  |
| S.05  | -1.16  | -0.96  | 0.20  |
| S.06  | 35.45  | 35.84  | 0.39  |
| S.07  | 47.08  | 46.68  | -0.40 |
| S.08  | 11.87  | 11.73  | -0.14 |
| S.09  | -3.02  | -3.10  | -0.08 |
| S.10  | -15.19 | -14.45 | 0.74  |
| Cl.01 | -3.29  | -3.23  | 0.06  |
| Cl.02 | 0.56   | 0.61   | 0.05  |
| Cl.03 | -1.64  | -1.62  | 0.02  |
| Ge.01 | 8.02   | 7.73   | -0.29 |
| Ge.02 | -7.38  | -7.56  | -0.18 |
| Ge.03 | 14.23  | 14.73  | 0.50  |
| Ge.04 | 26.73  | 26.88  | 0.15  |
| Ge.05 | 24.62  | 25.00  | 0.38  |
| Ge.06 | 19.65  | 19.89  | 0.24  |
| Ge.07 | 30.69  | 30.30  | -0.39 |
| Ge.08 | 19.07  | 19.02  | -0.05 |
| Ge.09 | -2.32  | -2.48  | -0.16 |

|       |        |        |       |
|-------|--------|--------|-------|
| Ge.10 | 93.48  | 94.52  | 1.04  |
| As.01 | -7.86  | -8.06  | -0.20 |
| As.02 | -5.71  | -5.87  | -0.16 |
| As.03 | 38.69  | 39.28  | 0.59  |
| As.04 | 27.23  | 27.38  | 0.15  |
| As.05 | 9.75   | 10.07  | 0.32  |
| As.06 | -4.78  | -4.38  | 0.40  |
| As.07 | 33.03  | 32.66  | -0.37 |
| As.08 | -4.18  | -4.17  | 0.01  |
| As.09 | -3.11  | -3.11  | 0.00  |
| As.10 | -2.91  | -2.57  | 0.34  |
| Se.01 | -6.77  | -7.01  | -0.24 |
| Se.02 | -5.13  | -5.28  | -0.15 |
| Se.03 | 15.99  | 16.49  | 0.50  |
| Se.04 | 20.83  | 21.04  | 0.21  |
| Se.05 | 0.04   | 0.22   | 0.18  |
| Se.06 | 32.84  | 33.18  | 0.34  |
| Se.07 | 43.35  | 42.93  | -0.42 |
| Se.08 | 10.72  | 10.59  | -0.13 |
| Se.09 | -2.86  | -3.00  | -0.14 |
| Se.10 | -68.86 | -68.35 | 0.51  |
| Br.01 | -6.26  | -6.18  | 0.08  |
| Br.02 | 0.06   | 0.11   | 0.05  |
| Br.03 | -1.63  | -1.62  | 0.01  |

---

Table 5: Study of higher order effects on reference results for a representative subset. The methods are: CCSD(T)(pFC)/cc-p(wC)VQZ (CC/QZ), CCSD(T)(pFC)/CBS(T,Q) (CC/CBS), HF/cc-p(wC)V5Z + correlation energy from CC/CBS, HF/cc-p(wC)V5Z + correlation energy from SCS-MP2(pFC)/CBS(T,Q) (MP2/CBS) + correction of higher order correlation effects from CCSD(T)(pFC)/cc-p(wC)VTZ – SCS-MP2(pFC)/cc-p(wC)VTZ ( $\Delta$ CC). All values in kcal mol<sup>-1</sup>.

| rect  | ref   | CC/QZ | CC/CBS | HF/5Z+ | HF/5Z+               | MP2/QZ+     |
|-------|-------|-------|--------|--------|----------------------|-------------|
|       |       |       |        | CC/CBS | MP2/CBS+ $\Delta$ CC | $\Delta$ CC |
| C.01  | 5.9   | 5.8   | 5.8    | 5.8    | 6.0                  | 6.0         |
| N.01  | 16.6  | 16.5  | 16.6   | 16.8   | 16.8                 | 16.5        |
| N.02  | 17.9  | 18.0  | 17.8   | 17.7   | 17.9                 | 18.1        |
| N.03  | -20.9 | -20.4 | -21.1  | -21.3  | -21.3                | -20.4       |
| O.01  | 15.7  | 15.6  | 15.7   | 15.8   | 15.9                 | 15.7        |
| O.02  | 25.2  | 25.4  | 25.2   | 25.1   | 25.2                 | 25.5        |
| O.03  | -63.7 | -63.0 | -63.6  | -63.9  | -64.2                | -63.2       |
| F.01  | 26.9  | 27.5  | 27.2   | 27.0   | 26.7                 | 27.3        |
| F.02  | 1.0   | 0.8   | 0.8    | 1.0    | 1.0                  | 0.8         |
| F.03  | -2.7  | -2.6  | -2.7   | -2.7   | -2.7                 | -2.6        |
| Si.01 | 6.4   | 6.6   | 6.2    | 6.2    | 6.5                  | 6.7         |
| Si.02 | -10.1 | -10.0 | -10.3  | -10.3  | -10.1                | -9.9        |
| Si.03 | -3.9  | -4.2  | -3.8   | -3.8   | -3.8                 | -4.2        |
| P.01  | -4.9  | -4.8  | -5.0   | -4.9   | -4.9                 | -4.8        |
| P.02  | -1.7  | -1.7  | -2.0   | -2.0   | -1.8                 | -1.6        |
| P.03  | 22.9  | 22.3  | 22.6   | 22.7   | 23.0                 | 22.5        |
| S.01  | -2.6  | -2.5  | -2.6   | -2.5   | -2.5                 | -2.4        |
| S.02  | -0.9  | -0.9  | -1.2   | -1.2   | -1.0                 | -0.8        |
| S.03  | 6.6   | 6.2   | 6.8    | 6.8    | 6.6                  | 6.1         |
| Cl.01 | -3.3  | -3.4  | -3.4   | -3.4   | -3.4                 | -3.4        |
| Cl.02 | 0.6   | 0.5   | 0.6    | 0.6    | 0.6                  | 0.5         |
| Cl.03 | -1.6  | -1.6  | -1.6   | -1.6   | -1.6                 | -1.6        |
| Ge.01 | 8.0   | 8.2   | 7.9    | 7.9    | 8.1                  | 8.3         |
| Ge.02 | -7.4  | -7.4  | -7.7   | -7.6   | -7.4                 | -7.2        |
| Ge.03 | 14.2  | 13.7  | 14.1   | 14.2   | 14.2                 | 13.7        |
| As.01 | -7.9  | -7.7  | -7.9   | -7.8   | -7.8                 | -7.7        |
| As.02 | -5.7  | -5.7  | -5.9   | -5.9   | -5.7                 | -5.6        |
| As.03 | 38.7  | 37.8  | 38.2   | 38.2   | 38.7                 | 38.1        |
| Se.01 | -6.8  | -6.6  | -6.7   | -6.7   | -6.7                 | -6.6        |
| Se.02 | -5.1  | -5.1  | -5.4   | -5.4   | -5.2                 | -5.0        |
| Se.03 | 16.0  | 15.5  | 16.1   | 16.1   | 16.0                 | 15.5        |

|       |      |      |      |      |      |      |
|-------|------|------|------|------|------|------|
| Br.01 | -6.3 | -6.3 | -6.2 | -6.2 | -6.4 | -6.3 |
| Br.02 | 0.1  | 0.0  | 0.1  | 0.2  | 0.1  | 0.0  |
| Br.03 | -1.6 | -1.6 | -1.6 | -1.6 | -1.6 | -1.6 |

## 1.1 Discussion of Reference Data Generation

The tables shown so far in the Supporting Information should help to judge the quality of the reference data used for the analysis in the main text (see also the discussion there). First, the effect of including relativistic effects is shown. For the heavier elements, these effects cannot be neglected for comparison to experiment but they should be quite invariant to the general electron structure method used and therefore can be skipped for just a method comparison. Next, the sensitivity with respect to the lower correlation method for estimating larger basis sets effects is studied. The difference between SCS-MP2 and MP2 is negligible. It never exceeds  $0.3 \text{ kcal mol}^{-1}$  and is less than  $0.1 \text{ kcal mol}^{-1}$  on average. Table 3 gives the difference between a frozen-core and a partial frozen-core treatment (with an appropriate basis set). Here, the latter treatment can be essential for heavier elements at the HF as well as at the post-HF level. Further, the effect of a still incomplete basis set is investigated in the next table by comparing the reference data with those from a basis set extrapolation with SCS-MP2 and higher order corrections. The effects are well within the expected error range. Finally, the effect of estimating higher order effects itself is examined. As this requires Coupled-Cluster computations with larger basis sets, this only done for a subset. Different approaches are tested of which the data based on HF/cc-p(wC)V5Z plus correlation energies based on CCSD(T) and a basis set extrapolation from cc-p(wC)VTZ and cc-p(wC)VQZ should be the most accurate. The absolute deviations with respect to the reference data are  $0.1 \text{ kcal mol}^{-1}$  on average with a maximum deviation of  $0.5 \text{ kcal mol}^{-1}$ . The table includes also two data sets which allow to check the quality of higher order corrections directly. One can compare HF/cc-p(wC)V5Z plus correlation energies based on SCS-MP2 and a basis set extrapolation from cc-p(wC)VTZ and cc-p(wC)VQZ plus a correlation energy correction at the triple- $\zeta$ -level with the aforementioned data. The absolute deviation between those two approaches is  $0.1 \text{ kcal mol}^{-1}$  with a maximum of  $0.4 \text{ kcal mol}^{-1}$ . The table also includes SCS-MP2/cc-p(wC)VQZ with a correlation energy correction at the triple- $\zeta$ -level which can be compared to pure CCSD(T)/cc-p(wC)VQZ results. The mean absolute deviation is  $0.1 \text{ kcal mol}^{-1}$  again, with a maximum of just  $0.2 \text{ kcal mol}^{-1}$ .

## 2 Complete List of Results for all Methods in the Test Set

Table 6: Reference isomerization energies based on RI-SCS-MP2(pFC)/cc-p(wC)V5Z computations with CCSD(T)(pFC)/cc-p(wC)TZ corrections for higher correlation contributions in comparison to SCS-MP2(pFC)/cc-p(wC)V5Z and various density functionals (same basis set) applied in the test set. Deviations are given in parentheses. All values in kcal mol<sup>-1</sup>.

| ret   | ref.  | oTPSS-D3 |        | M11-L |        | B3-LYP-D3 |         | PBE0-D3 |        | PW6B95-D3 |        |
|-------|-------|----------|--------|-------|--------|-----------|---------|---------|--------|-----------|--------|
| C.01  | 5.9   | 3.6      | (-2.3) | 5.5   | (-0.4) | 7.4       | (1.5)   | 1.9     | (-4.0) | 3.3       | (-2.6) |
| C.04  | 17.7  | 15.3     | (-2.4) | 17.5  | (-0.2) | 16.8      | (-0.9)  | 17.3    | (-0.4) | 16.5      | (-1.2) |
| C.05  | 3.8   | 2.4      | (1.4)  | 3.1   | (-0.7) | 2.4       | (-1.4)  | 2.6     | (-1.2) | 2.6       | (-1.2) |
| C.06  | 18.9  | 15.5     | (-3.4) | 17.7  | (-1.2) | 12.7      | (-6.2)  | 21.0    | (2.1)  | 17.9      | (-1.0) |
| C.07  | 45.1  | 50.7     | (5.5)  | 49.0  | (3.9)  | 56.6      | (11.4)  | 49.0    | (3.9)  | 49.3      | (4.2)  |
| C.08  | 1.3   | -1.5     | (-2.9) | -2.1  | (-3.4) | -1.8      | (-3.2)  | -1.6    | (-2.9) | -1.4      | (-2.7) |
| C.10  | -9.1  | -8.6     | (0.5)  | -10.2 | (-1.1) | -8.6      | (0.5)   | -8.5    | (0.6)  | -8.4      | (0.7)  |
| N.01  | 16.6  | 17.0     | (0.4)  | 16.7  | (0.0)  | 19.8      | (3.2)   | 15.1    | (-1.6) | 15.8      | (-0.9) |
| N.02  | 17.9  | 16.5     | (-1.4) | 18.2  | (0.3)  | 19.6      | (1.7)   | 14.4    | (-3.4) | 15.4      | (-2.5) |
| N.03  | -20.9 | -24.5    | (-3.5) | -21.6 | (-0.7) | -22.3     | (-1.4)  | -23.8   | (-2.9) | -22.7     | (-1.8) |
| N.04  | 12.3  | 10.0     | (-2.3) | 12.4  | (0.1)  | 11.9      | (-0.4)  | 11.9    | (-0.4) | 11.4      | (-0.9) |
| N.05  | -12.0 | -12.4    | (-0.4) | -11.1 | (0.9)  | -11.3     | (0.7)   | -12.0   | (0.0)  | -11.2     | (0.8)  |
| N.06  | 32.0  | 28.1     | (-4.0) | 31.1  | (-1.0) | 25.8      | (-6.3)  | 34.3    | (2.3)  | 31.7      | (-0.4) |
| N.07  | 57.1  | 65.2     | (8.1)  | 61.7  | (4.6)  | 69.7      | (12.6)  | 63.1    | (6.0)  | 62.8      | (5.7)  |
| N.08  | -14.2 | -18.2    | (-4.0) | -20.0 | (-5.9) | -16.9     | (-2.8)  | -16.6   | (-2.4) | -16.5     | (-2.4) |
| N.09  | -31.8 | -40.2    | (-8.5) | -36.4 | (-4.6) | -43.5     | (-11.7) | -34.5   | (-2.7) | -35.0     | (-3.2) |
| O.01  | 15.8  | 14.2     | (-1.5) | 16.2  | (0.4)  | 17.1      | (1.4)   | 13.3    | (-2.4) | 13.7      | (-2.1) |
| O.02  | 25.2  | 24.0     | (-1.2) | 27.0  | (1.8)  | 26.8      | (1.6)   | 22.8    | (-2.4) | 23.1      | (-2.2) |
| O.03  | -63.7 | -60.5    | (3.2)  | -63.3 | (0.4)  | -59.3     | (4.4)   | -62.3   | (1.4)  | -61.2     | (2.5)  |
| O.04  | 9.9   | 8.0      | (-1.9) | 10.3  | (0.5)  | 10.4      | (0.5)   | 9.5     | (-0.4) | 9.7       | (-0.2) |
| O.05  | -12.4 | -11.8    | (0.5)  | -11.8 | (0.5)  | -10.8     | (1.6)   | -12.0   | (0.3)  | -11.1     | (1.3)  |
| O.06  | 27.4  | 24.6     | (-2.8) | 27.2  | (-0.2) | 22.3      | (-5.1)  | 29.9    | (2.5)  | 27.8      | (0.4)  |
| O.07  | 58.8  | 65.5     | (6.7)  | 63.6  | (4.8)  | 69.4      | (10.6)  | 64.0    | (5.2)  | 63.1      | (4.3)  |
| O.08  | 19.6  | 24.8     | (5.2)  | 24.4  | (4.8)  | 23.4      | (3.8)   | 19.4    | (-0.3) | 20.6      | (0.9)  |
| O.09  | -11.5 | -12.2    | (-0.7) | -11.9 | (-0.4) | -12.5     | (-1.0)  | -11.8   | (-0.2) | -11.6     | (0.0)  |
| F.01  | 26.9  | 24.9     | (-2.0) | 33.7  | (6.8)  | 23.9      | (-3.0)  | 26.8    | (-0.2) | 25.6      | (-1.3) |
| F.02  | 1.0   | 1.1      | (0.1)  | 1.4   | (0.4)  | 0.9       | (-0.1)  | 1.0     | (0.1)  | 1.0       | (0.0)  |
| F.03  | -2.7  | -3.0     | (-0.4) | -2.4  | (0.3)  | -3.1      | (-0.4)  | -2.9    | (-0.2) | -2.8      | (-0.2) |
| Si.01 | 6.4   | 4.7      | (-1.8) | 9.6   | (3.1)  | 8.6       | (2.1)   | 2.3     | (-4.1) | 4.3       | (-2.1) |
| Si.02 | -10.1 | -11.4    | (-1.3) | -7.4  | (2.7)  | -8.7      | (1.3)   | -12.9   | (-2.9) | -12.3     | (-2.3) |
| Si.03 | -3.9  | -1.4     | (2.5)  | -11.1 | (-7.3) | -6.1      | (-2.2)  | 1.0     | (4.8)  | -2.5      | (1.4)  |



| ref.  | oTPSS-D3 | M11-L        | B3-LYP-D3     | PBE0-D3      | PW6B95-D3    |              |
|-------|----------|--------------|---------------|--------------|--------------|--------------|
| Si.04 | 28.2     | 26.2 (-2.0)  | 25.3 (-3.0)   | 26.8 (-1.4)  | 28.0 (-0.2)  | 27.1 (-1.1)  |
| Si.05 | 33.4     | 35.4 (2.0)   | 25.2 (-8.3)   | 31.3 (-2.1)  | 32.4 (-1.0)  | 32.6 (-0.8)  |
| Si.06 | 21.5     | 17.2 (-4.2)  | 15.9 (-5.6)   | 14.3 (-7.2)  | 22.6 (1.1)   | 19.9 (-1.6)  |
| Si.07 | 28.9     | 32.7 (3.8)   | 35.9 (7.0)    | 39.6 (10.7)  | 30.3 (1.4)   | 30.8 (1.9)   |
| Si.08 | 22.0     | 19.7 (-2.3)  | 20.1 (-1.9)   | 20.1 (-1.9)  | 18.3 (-3.7)  | 19.9 (-2.1)  |
| Si.09 | -4.5     | -7.5 (-3.0)  | -5.4 (-0.9)   | -9.3 (-4.8)  | -10.5 (-6.0) | -10.0 (-5.5) |
| Si.10 | 153.7    | 149.7 (-4.0) | 140.8 (-12.9) | 149.5 (-4.2) | 146.7 (-7.1) | 150.1 (-3.6) |
| P.01  | -4.9     | -5.8 (-0.9)  | -2.7 (2.3)    | -2.2 (2.8)   | -7.9 (-2.9)  | -6.6 (-1.7)  |
| P.02  | -1.7     | -3.5 (-1.8)  | 0.2 (1.9)     | -0.1 (1.6)   | -5.2 (-3.4)  | -4.4 (-2.7)  |
| P.03  | 23.0     | 20.8 (-2.1)  | 16.5 (-6.5)   | 19.4 (-3.5)  | 22.1 (-0.8)  | 21.3 (-1.6)  |
| P.04  | 26.1     | 23.7 (-2.4)  | 23.7 (-2.4)   | 24.7 (-1.5)  | 25.6 (-0.6)  | 24.9 (-1.3)  |
| P.05  | 10.8     | 10.9 (0.1)   | 6.4 (-4.4)    | 9.6 (-1.2)   | 10.3 (-0.5)  | 10.6 (-0.1)  |
| P.06  | 6.6      | 6.0 (-0.6)   | 6.6 (-0.1)    | -0.3 (-7.0)  | 10.1 (3.5)   | 6.7 (0.1)    |
| P.07  | 35.3     | 41.6 (6.3)   | 43.0 (7.7)    | 47.4 (12.1)  | 39.1 (3.8)   | 39.1 (3.8)   |
| P.08  | -3.9     | -6.0 (-2.1)  | -7.2 (-3.4)   | -5.8 (-1.9)  | -6.4 (-2.5)  | -5.6 (-1.8)  |
| P.09  | 17.9     | 13.0 (-4.9)  | 9.8 (-8.1)    | 9.8 (-8.1)   | 16.8 (-1.1)  | 16.1 (-1.8)  |
| P.10  | 33.2     | 35.6 (2.4)   | 37.0 (3.9)    | 31.0 (-2.2)  | 32.9 (-0.2)  | 31.3 (-1.8)  |
| S.01  | -2.6     | -2.7 (-0.1)  | -0.6 (2.0)    | 0.4 (2.9)    | -4.7 (-2.1)  | -4.1 (-1.5)  |
| S.02  | -0.9     | -2.2 (-1.3)  | 1.8 (2.7)     | 1.2 (2.1)    | -4.0 (-3.1)  | -3.4 (-2.5)  |
| S.03  | 6.6      | 9.0 (2.5)    | 5.7 (-0.9)    | 8.4 (1.8)    | 8.4 (1.8)    | 9.0 (2.5)    |
| S.04  | 19.8     | 17.0 (-2.8)  | 17.9 (-1.9)   | 18.3 (-1.4)  | 19.1 (-0.7)  | 18.6 (-1.2)  |
| S.05  | -1.2     | -0.8 (0.3)   | -2.5 (-1.4)   | -1.1 (0.1)   | -0.9 (0.3)   | -0.6 (0.6)   |
| S.06  | 35.5     | 31.5 (-3.9)  | 33.3 (-2.1)   | 28.1 (-7.3)  | 37.2 (1.8)   | 34.4 (-1.0)  |
| S.07  | 47.1     | 55.1 (8.0)   | 55.7 (8.6)    | 59.7 (12.6)  | 52.5 (5.5)   | 52.1 (5.1)   |
| S.08  | 11.9     | 17.9 (6.0)   | 16.9 (5.0)    | 16.5 (4.6)   | 11.6 (-0.3)  | 13.1 (1.2)   |
| S.09  | -3.0     | -2.6 (0.4)   | -4.2 (-1.2)   | -3.0 (0.0)   | -2.6 (0.4)   | -2.4 (0.7)   |
| S.10  | -15.2    | -7.1 (8.1)   | -1.3 (13.9)   | -13.9 (1.3)  | -12.3 (2.9)  | -11.8 (3.4)  |
| Cl.01 | -3.3     | -3.7 (-0.4)  | -0.4 (2.9)    | -4.7 (-1.4)  | -3.9 (-0.6)  | -3.9 (-0.6)  |
| Cl.02 | 0.6      | 0.3 (-0.3)   | 1.0 (0.5)     | 0.2 (-0.4)   | 0.5 (-0.1)   | 0.6 (0.0)    |
| Cl.03 | -1.6     | -2.4 (-0.7)  | -1.4 (0.2)    | -2.5 (-0.8)  | -2.0 (-0.4)  | -1.8 (-0.1)  |
| Ge.01 | 8.0      | 7.2 (-0.8)   | 11.2 (3.2)    | 10.6 (2.6)   | 5.0 (-3.1)   | 6.6 (-1.4)   |
| Ge.02 | -7.4     | -8.8 (-1.4)  | -5.3 (2.1)    | -6.0 (1.4)   | -10.2 (-2.8) | -9.8 (-2.4)  |
| Ge.03 | 14.2     | 12.8 (-1.4)  | 2.9 (-11.4)   | 13.1 (-1.2)  | 16.5 (2.3)   | 14.6 (0.4)   |
| Ge.04 | 26.7     | 24.1 (-2.7)  | 22.4 (-4.3)   | 25.0 (-1.8)  | 25.8 (-1.0)  | 24.9 (-1.8)  |
| Ge.05 | 24.6     | 25.2 (0.6)   | 12.5 (-12.1)  | 21.6 (-3.0)  | 22.1 (-2.5)  | 22.6 (-2.0)  |
| Ge.06 | 19.7     | 15.0 (-4.6)  | 13.5 (-6.1)   | 12.2 (-7.5)  | 20.0 (0.4)   | 17.3 (-2.3)  |

| rct   | ref.  | oTPSS-D3 |        | M11-L |         | B3-LYP-D3 |        | PBE0-D3 |        | PW6B95-D3 |        |
|-------|-------|----------|--------|-------|---------|-----------|--------|---------|--------|-----------|--------|
| Ge.07 | 30.7  | 34.9     | (4.2)  | 38.4  | (7.7)   | 40.9      | (10.2) | 32.8    | (2.1)  | 33.1      | (2.4)  |
| Ge.08 | 19.1  | 17.8     | (-1.3) | 17.5  | (-1.6)  | 17.6      | (-1.5) | 16.3    | (-2.8) | 17.8      | (-1.3) |
| Ge.09 | -2.3  | -5.4     | (-3.1) | -4.1  | (-1.8)  | -6.1      | (-3.8) | -8.2    | (-5.9) | -7.6      | (-5.2) |
| Ge.10 | 93.5  | 92.2     | (-1.3) | 74.3  | (-19.2) | 89.0      | (-4.4) | 87.0    | (-6.5) | 89.4      | (-4.1) |
| As.01 | -7.9  | -7.8     | (0.0)  | -5.5  | (2.4)   | -5.4      | (2.5)  | -10.2   | (-2.3) | -9.2      | (-1.3) |
| As.02 | -5.7  | -7.2     | (-1.5) | -4.0  | (1.8)   | -4.8      | (1.0)  | -9.0    | (-3.3) | -8.6      | (-2.9) |
| As.03 | 38.7  | 34.1     | (-4.6) | 26.8  | (-11.9) | 36.0      | (-2.7) | 37.4    | (-1.3) | 37.1      | (-1.6) |
| As.04 | 27.2  | 24.3     | (-2.9) | 23.3  | (-4.0)  | 25.5      | (-1.7) | 26.1    | (-1.2) | 25.5      | (-1.8) |
| As.05 | 9.8   | 9.7      | (-0.1) | 2.6   | (-7.2)  | 8.1       | (-1.7) | 8.2     | (-1.6) | 8.9       | (-0.9) |
| As.06 | -4.8  | -7.8     | (-3.0) | -7.0  | (-2.2)  | -13.2     | (-8.5) | -2.5    | (2.3)  | -6.2      | (-1.4) |
| As.07 | 33.0  | 39.1     | (6.0)  | 41.8  | (8.8)   | 44.3      | (11.3) | 36.9    | (3.8)  | 36.6      | (3.6)  |
| As.08 | -4.2  | -5.5     | (-1.3) | -7.1  | (-2.9)  | -5.8      | (-1.6) | -6.3    | (-2.1) | -5.5      | (-1.3) |
| As.09 | -3.1  | -6.8     | (-3.7) | -5.3  | (-2.2)  | -7.9      | (-4.8) | -6.6    | (-3.5) | -6.0      | (-2.9) |
| As.10 | -2.9  | -1.1     | (1.8)  | -7.6  | (-4.7)  | -7.0      | (-4.1) | -4.0    | (-1.1) | -6.2      | (-3.3) |
| Se.01 | -6.8  | -5.5     | (1.3)  | -3.6  | (3.2)   | -3.9      | (2.8)  | -8.3    | (-1.5) | -7.7      | (-1.0) |
| Se.02 | -5.1  | -6.0     | (-0.8) | -2.0  | (3.1)   | -3.6      | (1.5)  | -8.0    | (-2.8) | -7.7      | (-2.5) |
| Se.03 | 16.0  | 17.6     | (1.6)  | 10.9  | (-5.1)  | 17.5      | (1.6)  | 17.1    | (1.1)  | 18.0      | (2.0)  |
| Se.04 | 20.8  | 17.5     | (-3.3) | 16.9  | (-3.9)  | 19.0      | (-1.8) | 19.5    | (-1.3) | 19.2      | (-1.7) |
| Se.05 | 0.0   | 0.1      | (0.1)  | -3.2  | (-3.2)  | -0.2      | (-0.3) | -0.3    | (-0.4) | 0.1       | (0.1)  |
| Se.06 | 32.8  | 28.3     | (-4.6) | 28.4  | (-4.4)  | 25.1      | (-7.8) | 33.7    | (0.9)  | 31.0      | (-1.9) |
| Se.07 | 43.4  | 51.2     | (7.9)  | 53.5  | (10.1)  | 55.3      | (12.0) | 48.8    | (5.5)  | 48.2      | (4.8)  |
| Se.08 | 10.7  | 16.6     | (5.9)  | 15.5  | (4.8)   | 15.3      | (4.6)  | 10.3    | (-0.4) | 11.8      | (1.0)  |
| Se.09 | -2.9  | -1.5     | (1.3)  | -3.8  | (-0.9)  | -2.5      | (0.4)  | -2.3    | (0.6)  | -1.8      | (1.1)  |
| Se.10 | -68.9 | -55.7    | (13.2) | -72.0 | (-3.2)  | -67.8     | (1.0)  | -69.7   | (-0.9) | -68.9     | (0.0)  |
| Br.01 | -6.3  | -6.6     | (-0.3) | -4.5  | (1.8)   | -7.8      | (-1.5) | -7.1    | (-0.8) | -6.8      | (-0.6) |
| Br.02 | 0.1   | -0.4     | (-0.5) | 0.4   | (0.3)   | -0.6      | (-0.7) | -0.1    | (-0.2) | 0.0       | (-0.1) |
| Br.03 | -1.6  | -2.3     | (-0.6) | -1.7  | (0.0)   | -2.5      | (-0.9) | -2.1    | (-0.5) | -1.8      | (-0.1) |

Table 7: Reference isomerization energies based on RI-SCS-MP2(pFC)/cc-p(wC)V5Z computations with CCSD(T)(pFC)/cc-p(wC)TZ corrections for higher correlation contributions in comparison to SCS-MP2(pFC)/cc-p(wC)V5Z and various density functionals (same basis set) applied in the test set. Deviations are given in parentheses. All values in kcal mol<sup>-1</sup>.

| rcf   | ref.  | SCS-MP2 |        | B2GP-PLYP-D3 |        | M06-2X |        | M11   |        | $\omega$ B97X-D |        |
|-------|-------|---------|--------|--------------|--------|--------|--------|-------|--------|-----------------|--------|
| C.01  | 5.9   | 4.9     | (-1.0) | 5.7          | (-0.2) | 2.1    | (-3.8) | 1.4   | (-4.5) | 2.3             | (-3.6) |
| C.04  | 17.7  | 17.5    | (-0.2) | 17.7         | (0.0)  | 17.0   | (-0.7) | 17.4  | (-0.3) | 16.8            | (-0.9) |
| C.05  | 3.8   | 3.7     | (0.0)  | 3.3          | (-0.4) | 3.5    | (-0.3) | 3.3   | (-0.5) | 3.2             | (-0.5) |
| C.06  | 18.9  | 19.9    | (1.0)  | 17.7         | (-1.2) | 18.4   | (-0.5) | 20.0  | (1.2)  | 21.8            | (2.9)  |
| C.07  | 45.1  | 45.7    | (0.5)  | 51.8         | (6.7)  | 50.2   | (5.1)  | 49.9  | (4.7)  | 48.9            | (3.8)  |
| C.08  | 1.3   | 4.2     | (2.8)  | 1.6          | (0.3)  | 0.6    | (-0.7) | 0.3   | (-1.0) | -0.3            | (-1.6) |
| C.10  | -9.1  | -9.9    | (-0.8) | -9.3         | (-0.2) | -7.7   | (1.4)  | -8.5  | (0.6)  | -9.8            | (-0.7) |
| N.01  | 16.6  | 15.7    | (-0.9) | 17.8         | (1.1)  | 14.4   | (-2.3) | 14.6  | (-2.0) | 14.8            | (-1.8) |
| N.02  | 17.9  | 17.1    | (-0.8) | 17.9         | (0.1)  | 13.9   | (-3.9) | 13.7  | (-4.2) | 15.1            | (-2.8) |
| N.03  | -20.9 | -21.0   | (0.0)  | -22.6        | (-1.7) | -23.2  | (-2.3) | -23.4 | (-2.5) | -21.6           | (-0.7) |
| N.04  | 12.3  | 12.1    | (-0.3) | 12.4         | (0.1)  | 12.1   | (-0.3) | 12.2  | (-0.1) | 11.4            | (-0.9) |
| N.05  | -12.0 | -11.7   | (0.3)  | -11.5        | (0.5)  | -10.5  | (1.5)  | -11.1 | (0.9)  | -11.7           | (0.3)  |
| N.06  | 32.0  | 34.3    | (2.3)  | 31.9         | (-0.2) | 33.0   | (1.0)  | 35.7  | (3.6)  | 35.7            | (3.7)  |
| N.07  | 57.1  | 58.0    | (0.8)  | 64.9         | (7.8)  | 63.1   | (6.0)  | 63.5  | (6.3)  | 62.1            | (4.9)  |
| N.08  | -14.2 | -12.6   | (1.6)  | -14.4        | (-0.3) | -14.2  | (0.0)  | -14.5 | (-0.3) | -15.6           | (-1.4) |
| N.09  | -31.8 | -31.6   | (0.2)  | -36.4        | (-4.6) | -33.2  | (-1.5) | -31.5 | (0.3)  | -35.4           | (-3.6) |
| O.01  | 15.8  | 14.4    | (-1.3) | 15.8         | (0.1)  | 13.5   | (-2.3) | 13.3  | (-2.5) | 13.4            | (-2.3) |
| O.02  | 25.2  | 25.0    | (-0.2) | 25.9         | (0.7)  | 21.6   | (-3.6) | 22.3  | (-2.9) | 23.9            | (-1.3) |
| O.03  | -63.7 | -64.8   | (-1.1) | -63.4        | (0.2)  | -63.7  | (0.0)  | -64.4 | (-0.7) | -62.4           | (1.3)  |
| O.04  | 9.9   | 9.7     | (-0.2) | 10.3         | (0.4)  | 10.1   | (0.2)  | 9.9   | (0.0)  | 9.1             | (-0.8) |
| O.05  | -12.4 | -12.2   | (0.1)  | -11.8        | (0.6)  | -10.9  | (1.5)  | -11.6 | (0.7)  | -11.9           | (0.4)  |
| O.06  | 27.4  | 29.1    | (1.7)  | 27.4         | (0.0)  | 28.5   | (1.1)  | 30.8  | (3.4)  | 31.3            | (3.9)  |
| O.07  | 58.8  | 59.8    | (1.0)  | 65.7         | (6.9)  | 63.7   | (4.9)  | 64.0  | (5.2)  | 62.8            | (4.0)  |
| O.08  | 19.6  | 20.3    | (0.6)  | 21.4         | (1.8)  | 19.0   | (-0.6) | 21.2  | (1.5)  | 20.8            | (1.2)  |
| O.09  | -11.5 | -12.0   | (-0.5) | -12.2        | (-0.7) | -10.6  | (1.0)  | -11.8 | (-0.3) | -13.2           | (-1.7) |
| F.01  | 26.9  | 26.3    | (-0.6) | 26.2         | (-0.7) | 27.0   | (0.1)  | 26.7  | (-0.3) | 26.9            | (-0.1) |
| F.02  | 1.0   | 1.1     | (0.1)  | 1.0          | (0.1)  | 0.8    | (-0.2) | 0.8   | (-0.2) | 0.9             | (-0.1) |
| F.03  | -2.7  | -2.7    | (0.0)  | -2.9         | (-0.2) | -2.7   | (0.0)  | -2.6  | (0.0)  | 0.0             | (2.7)  |
| Si.01 | 6.4   | 6.6     | (0.1)  | 6.7          | (0.2)  | 3.5    | (-2.9) | 2.5   | (-4.0) | 3.6             | (-2.8) |
| Si.02 | -10.1 | -10.9   | (-0.8) | -10.4        | (-0.3) | -13.2  | (-3.1) | -15.2 | (-5.1) | -13.8           | (-3.8) |
| Si.03 | -3.9  | -7.6    | (-3.7) | -5.8         | (-1.9) | -3.3   | (0.6)  | -4.6  | (-0.7) | -3.6            | (0.3)  |
| Si.04 | 28.2  | 27.6    | (-0.6) | 28.2         | (0.0)  | 28.2   | (0.0)  | 29.0  | (0.7)  | 27.2            | (-1.0) |

| rct   | ref.  | SCS-MP2 |        | B2GP-PLYP-D3 |        | M06-2X |        | M11   |        | $\omega$ B97X-D |        |
|-------|-------|---------|--------|--------------|--------|--------|--------|-------|--------|-----------------|--------|
| Si.05 | 33.4  | 32.7    | (-0.7) | 32.7         | (-0.7) | 34.0   | (0.6)  | 36.8  | (3.3)  | 32.8            | (-0.6) |
| Si.06 | 21.5  | 21.9    | (0.4)  | 19.6         | (-1.9) | 21.0   | (-0.5) | 22.9  | (1.4)  | 23.0            | (1.5)  |
| Si.07 | 28.9  | 29.5    | (0.6)  | 34.4         | (5.5)  | 31.2   | (2.4)  | 31.2  | (2.3)  | 31.6            | (2.7)  |
| Si.08 | 22.0  | 26.3    | (4.3)  | 23.4         | (1.4)  | 22.1   | (0.1)  | 22.9  | (0.9)  | 21.6            | (-0.4) |
| Si.09 | -4.5  | -6.5    | (-2.0) | -7.3         | (-2.8) | -11.5  | (-7.0) | -13.0 | (-8.5) | -12.7           | (-8.2) |
| Si.10 | 153.7 | 156.4   | (2.6)  | 155.1        | (1.4)  | 155.1  | (1.4)  | 159.7 | (6.0)  | 147.2           | (-6.5) |
| P.01  | -4.9  | -5.9    | (-0.9) | -4.8         | (0.2)  | -7.8   | (-2.9) | -8.0  | (-3.1) | -7.0            | (-2.1) |
| P.02  | -1.7  | -2.9    | (-1.1) | -2.0         | (-0.2) | -5.5   | (-3.7) | -6.3  | (-4.5) | -5.2            | (-3.5) |
| P.03  | 23.0  | 22.8    | (-0.1) | 21.8         | (-1.2) | 22.5   | (-0.4) | 20.8  | (-2.1) | 20.2            | (-2.8) |
| P.04  | 26.1  | 26.0    | (-0.2) | 26.2         | (0.0)  | 25.8   | (-0.3) | 26.2  | (0.0)  | 24.9            | (-1.3) |
| P.05  | 10.8  | 11.2    | (0.4)  | 10.8         | (0.0)  | 11.1   | (0.3)  | 11.6  | (0.8)  | 10.5            | (-0.3) |
| P.06  | 6.6   | 9.6     | (3.0)  | 7.1          | (0.5)  | 7.3    | (0.7)  | 9.1   | (2.5)  | 8.9             | (2.3)  |
| P.07  | 35.3  | 35.5    | (0.2)  | 41.7         | (6.4)  | 39.8   | (4.4)  | 39.7  | (4.4)  | 39.5            | (4.2)  |
| P.08  | -3.9  | -0.7    | (3.2)  | -3.1         | (0.8)  | -3.8   | (0.1)  | -3.3  | (0.6)  | -4.0            | (-0.1) |
| P.09  | 17.9  | 18.1    | (0.2)  | 15.0         | (-2.9) | 17.0   | (-0.9) | 21.2  | (3.3)  | 18.3            | (0.4)  |
| P.10  | 33.2  | 34.6    | (1.4)  | 33.7         | (0.5)  | 28.6   | (-4.5) | 30.5  | (-2.7) | 33.4            | (0.2)  |
| S.01  | -2.6  | -4.1    | (-1.5) | -2.5         | (0.1)  | -5.2   | (-2.6) | -6.4  | (-3.8) | -4.3            | (-1.7) |
| S.02  | -0.9  | -2.3    | (-1.4) | -0.9         | (0.0)  | -4.6   | (-3.7) | -5.6  | (-4.7) | -3.6            | (-2.6) |
| S.03  | 6.6   | 7.0     | (0.4)  | 7.7          | (1.1)  | 8.3    | (1.7)  | 8.2   | (1.7)  | 7.2             | (0.6)  |
| S.04  | 19.8  | 19.9    | (0.1)  | 19.7         | (-0.1) | 19.4   | (-0.3) | 19.9  | (0.1)  | 18.3            | (-1.4) |
| S.05  | -1.2  | -0.9    | (0.3)  | -1.0         | (0.2)  | -0.5   | (0.7)  | -0.3  | (0.9)  | -1.0            | (0.2)  |
| S.06  | 35.5  | 38.4    | (2.9)  | 35.6         | (0.1)  | 35.3   | (-0.1) | 37.3  | (1.8)  | 37.6            | (2.2)  |
| S.07  | 47.1  | 47.4    | (0.3)  | 54.3         | (7.2)  | 52.5   | (5.4)  | 51.7  | (4.6)  | 51.9            | (4.9)  |
| S.08  | 11.9  | 12.4    | (0.5)  | 13.8         | (1.9)  | 11.0   | (-0.9) | 12.5  | (0.6)  | 12.5            | (0.6)  |
| S.09  | -3.0  | -2.7    | (0.3)  | -3.2         | (-0.2) | -2.5   | (0.5)  | -2.7  | (0.3)  | -2.9            | (0.1)  |
| S.10  | -15.2 | -10.6   | (4.6)  | -11.4        | (3.8)  | -19.5  | (-4.3) | -19.3 | (-4.1) | -11.3           | (3.9)  |
| Cl.01 | -3.3  | -2.9    | (0.4)  | -3.6         | (-0.3) | -3.9   | (-0.6) | -4.1  | (-0.8) | -4.1            | (-0.8) |
| Cl.02 | 0.6   | 0.7     | (0.1)  | 0.6          | (0.0)  | 0.7    | (0.1)  | 0.7   | (0.1)  | 0.6             | (0.0)  |
| Cl.03 | -1.6  | -1.5    | (0.1)  | -1.9         | (-0.2) | -1.6   | (0.1)  | -1.5  | (0.1)  | -2.0            | (-0.4) |
| Ge.01 | 8.0   | 7.6     | (-0.4) | 8.3          | (0.3)  | 6.3    | (-1.8) | 5.9   | (-2.1) | 6.6             | (-1.4) |
| Ge.02 | -7.4  | -8.0    | (-0.6) | -7.6         | (-0.2) | -11.4  | (-4.0) | -12.9 | (-5.6) | -10.7           | (-3.3) |
| Ge.03 | 14.2  | 13.1    | (-1.2) | 14.0         | (-0.3) | 13.7   | (-0.6) | 12.7  | (-1.5) | 11.8            | (-2.4) |
| Ge.04 | 26.7  | 26.4    | (-0.3) | 26.5         | (-0.2) | 27.0   | (0.3)  | 26.6  | (-0.1) | 24.9            | (-1.8) |
| Ge.05 | 24.6  | 24.9    | (0.3)  | 23.6         | (-1.1) | 27.2   | (2.6)  | 25.7  | (1.0)  | 22.1            | (-2.5) |
| Ge.06 | 19.7  | 20.4    | (0.7)  | 17.7         | (-1.9) | 19.1   | (-0.6) | 20.1  | (0.5)  | 20.2            | (0.5)  |
| Ge.07 | 30.7  | 30.9    | (0.2)  | 36.0         | (5.3)  | 32.4   | (1.8)  | 34.1  | (3.4)  | 34.5            | (3.8)  |

| rct   | ref.  | SCS-MP2 |        | B2GP-PLYP-D3 |        | M06-2X |        | M11   |         | $\omega$ B97X-D |        |
|-------|-------|---------|--------|--------------|--------|--------|--------|-------|---------|-----------------|--------|
| Ge.08 | 19.1  | 22.7    | (3.6)  | 20.4         | (1.3)  | 21.6   | (2.5)  | 22.2  | (3.1)   | 19.7            | (0.6)  |
| Ge.09 | -2.3  | -2.9    | (-0.6) | -3.8         | (-1.5) | -11.0  | (-8.6) | -10.2 | (-7.8)  | -10.1           | (-7.8) |
| Ge.10 | 93.5  | 96.3    | (2.9)  | 93.9         | (0.4)  | 102.   | (8.7)  | 97.4  | (3.9)   | 87.5            | (-5.9) |
| As.01 | -7.9  | -9.3    | (-1.4) | -8.1         | (-0.2) | -9.7   | (-1.9) | -11.2 | (-3.3)  | -8.6            | (-0.8) |
| As.02 | -5.7  | -7.0    | (-1.3) | -6.3         | (-0.5) | -10.0  | (-4.3) | -11.3 | (-5.6)  | -8.4            | (-2.7) |
| As.03 | 38.7  | 40.0    | (1.3)  | 38.7         | (0.1)  | 37.7   | (-1.0) | 37.2  | (-1.5)  | 34.4            | (-4.3) |
| As.04 | 27.2  | 27.3    | (0.0)  | 27.2         | (-0.1) | 27.2   | (0.0)  | 27.1  | (-0.1)  | 25.2            | (-2.1) |
| As.05 | 9.8   | 10.5    | (0.7)  | 9.5          | (-0.3) | 11.1   | (1.4)  | 10.0  | (0.2)   | 8.3             | (-1.5) |
| As.06 | -4.8  | -1.7    | (3.0)  | -4.9         | (-0.1) | -3.7   | (1.1)  | -3.5  | (1.2)   | -4.4            | (0.4)  |
| As.07 | 33.0  | 32.9    | (-0.1) | 38.9         | (5.9)  | 37.1   | (4.1)  | 37.8  | (4.8)   | 37.6            | (4.6)  |
| As.08 | -4.2  | -1.5    | (2.7)  | -3.6         | (0.5)  | -2.4   | (1.7)  | -3.3  | (0.8)   | -3.7            | (0.5)  |
| As.09 | -3.1  | -3.1    | (0.0)  | -5.1         | (-2.0) | -3.2   | (-0.1) | -1.0  | (2.1)   | -4.8            | (-1.7) |
| As.10 | -2.9  | -2.6    | (0.3)  | -4.0         | (-1.1) | -5.7   | (-2.7) | -9.3  | (-6.4)  | -3.9            | (-1.0) |
| Se.01 | -6.8  | -8.6    | (-1.8) | -6.9         | (-0.2) | -8.7   | (-1.9) | -10.2 | (-3.4)  | -7.4            | (-0.6) |
| Se.02 | -5.1  | -6.8    | (-1.7) | -5.4         | (-0.2) | -9.2   | (-4.0) | -10.3 | (-5.2)  | -7.3            | (-2.2) |
| Se.03 | 16.0  | 16.7    | (0.7)  | 17.0         | (1.0)  | 18.2   | (2.2)  | 17.5  | (1.5)   | 15.7            | (-0.3) |
| Se.04 | 20.8  | 21.1    | (0.2)  | 20.6         | (-0.2) | 20.5   | (-0.4) | 20.6  | (-0.3)  | 18.6            | (-2.2) |
| Se.05 | 0.0   | 0.5     | (0.4)  | 0.0          | (0.0)  | 0.8    | (0.7)  | 0.4   | (0.4)   | -0.4            | (-0.4) |
| Se.06 | 32.8  | 35.7    | (2.9)  | 32.6         | (-0.2) | 32.2   | (-0.6) | 33.9  | (1.0)   | 33.8            | (0.9)  |
| Se.07 | 43.4  | 43.4    | (0.0)  | 50.1         | (6.7)  | 48.8   | (5.5)  | 48.6  | (5.2)   | 48.6            | (5.3)  |
| Se.08 | 10.7  | 11.3    | (0.5)  | 12.6         | (1.8)  | 9.8    | (-0.9) | 11.4  | (0.7)   | 11.3            | (0.6)  |
| Se.09 | -2.9  | -2.5    | (0.4)  | -3.2         | (-0.3) | -1.6   | (1.3)  | -2.3  | (0.6)   | -2.0            | (0.8)  |
| Se.10 | -68.9 | -66.1   | (2.7)  | -67.0        | (1.9)  | -71.3  | (-2.4) | -83.5 | (-14.6) | -67.1           | (1.7)  |
| Br.01 | -6.3  | -5.2    | (1.1)  | -6.4         | (-0.1) | -7.3   | (-1.0) | -7.4  | (-1.2)  | -7.3            | (-1.1) |
| Br.02 | 0.1   | 0.2     | (0.1)  | 0.0          | (-0.1) | 0.2    | (0.1)  | 0.2   | (0.2)   | 0.0             | (0.0)  |
| Br.03 | -1.6  | -1.4    | (0.2)  | -1.8         | (-0.2) | -1.6   | (0.0)  | -1.6  | (0.0)   | -2.0            | (-0.4) |

Table 8: Reference isomerization energies based on RI-SCS-MP2(pFC)/cc-p(wC)V5Z computations with CCSD(T)(pFC)/cc-p(wC)TZ corrections for higher correlation contributions in comparison to density functionals with and without dispersion correction (same basis set). Deviations are given in parentheses. The mean deviation ( $\bar{x}$ ), the mean absolute deviation ( $\overline{|x|}$ ), the median of the absolute deviation ( $\widetilde{|x|}$ ), the maximum ( $x_{\max}$ ) and minimum deviation ( $x_{\min}$ ) are given at the end. All values in kcal mol<sup>-1</sup>.

| rct   | ref.  | B2GP-PLYP |        |         |        | B3LYP   |         |         |         | PBE0    |        |         |        |
|-------|-------|-----------|--------|---------|--------|---------|---------|---------|---------|---------|--------|---------|--------|
|       |       | with D3   |        | without |        | with D3 |         | without |         | with D3 |        | without |        |
| C.01  | 5.9   | 5.7       | (-0.2) | 5.7     | (-0.2) | 7.4     | (1.5)   | 7.4     | (1.5)   | 1.9     | (-4.0) | 1.9     | (-4.0) |
| C.04  | 17.7  | 17.7      | (0.0)  | 17.7    | (0.0)  | 16.8    | (-0.9)  | 16.8    | (-0.9)  | 17.3    | (-0.4) | 17.3    | (-0.4) |
| C.05  | 3.8   | 3.3       | (-0.4) | 2.7     | (-1.0) | 2.4     | (-1.4)  | 0.8     | (-3.0)  | 2.6     | (-1.2) | 1.6     | (-2.2) |
| C.06  | 18.9  | 17.7      | (-1.2) | 17.5    | (-1.4) | 12.7    | (-6.2)  | 12.0    | (-6.9)  | 21.0    | (2.1)  | 20.5    | (1.6)  |
| C.07  | 45.1  | 51.8      | (6.7)  | 52.1    | (6.9)  | 56.6    | (11.4)  | 57.3    | (12.1)  | 49.0    | (3.9)  | 49.4    | (4.3)  |
| C.08  | 1.3   | 1.6       | (0.3)  | 1.6     | (0.2)  | -1.8    | (-3.2)  | -1.9    | (-3.2)  | -1.6    | (-2.9) | -1.6    | (-2.9) |
| C.10  | -9.1  | -9.3      | (-0.2) | -9.1    | (0.0)  | -8.6    | (0.5)   | -8.2    | (0.9)   | -8.5    | (0.6)  | -8.3    | (0.8)  |
| N.01  | 16.6  | 17.8      | (1.1)  | 17.7    | (1.1)  | 19.8    | (3.2)   | 19.7    | (3.0)   | 15.1    | (-1.6) | 15.0    | (-1.7) |
| N.02  | 17.9  | 17.9      | (0.1)  | 17.8    | (0.0)  | 19.6    | (1.7)   | 19.3    | (1.4)   | 14.4    | (-3.4) | 14.3    | (-3.6) |
| N.03  | -20.9 | -22.6     | (-1.7) | -22.4   | (-1.5) | -22.3   | (-1.4)  | -21.8   | (-0.9)  | -23.8   | (-2.9) | -23.5   | (-2.6) |
| N.04  | 12.3  | 12.4      | (0.1)  | 12.4    | (0.1)  | 11.9    | (-0.4)  | 12.1    | (-0.2)  | 11.9    | (-0.4) | 12.0    | (-0.3) |
| N.05  | -12.0 | -11.5     | (0.5)  | -11.6   | (0.4)  | -11.3   | (0.7)   | -11.3   | (0.7)   | -12.0   | (0.0)  | -12.0   | (0.0)  |
| N.06  | 32.0  | 31.9      | (-0.2) | 31.8    | (-0.2) | 25.8    | (-6.3)  | 25.4    | (-6.6)  | 34.3    | (2.3)  | 34.1    | (2.0)  |
| N.07  | 57.1  | 64.9      | (7.8)  | 65.1    | (7.9)  | 69.7    | (12.6)  | 70.1    | (13.0)  | 63.1    | (6.0)  | 63.3    | (6.2)  |
| N.08  | -14.2 | -14.4     | (-0.3) | -14.4   | (-0.3) | -16.9   | (-2.8)  | -16.9   | (-2.8)  | -16.6   | (-2.4) | -16.6   | (-2.4) |
| N.09  | -31.8 | -36.4     | (-4.6) | -35.9   | (-4.1) | -43.5   | (-11.7) | -42.3   | (-10.6) | -34.5   | (-2.7) | -33.9   | (-2.1) |
| O.01  | 15.8  | 15.8      | (0.1)  | 15.9    | (0.1)  | 17.1    | (1.4)   | 17.1    | (1.4)   | 13.3    | (-2.4) | 13.3    | (-2.4) |
| O.02  | 25.2  | 25.9      | (0.7)  | 25.9    | (0.7)  | 26.8    | (1.6)   | 26.7    | (1.5)   | 22.8    | (-2.4) | 22.7    | (-2.5) |
| O.03  | -63.7 | -63.4     | (0.2)  | -63.2   | (0.5)  | -59.3   | (4.4)   | -58.8   | (4.9)   | -62.3   | (1.4)  | -62.0   | (1.7)  |
| O.04  | 9.9   | 10.3      | (0.4)  | 10.4    | (0.5)  | 10.4    | (0.5)   | 10.6    | (0.8)   | 9.5     | (-0.4) | 9.7     | (-0.2) |
| O.05  | -12.4 | -11.8     | (0.6)  | -11.8   | (0.6)  | -10.8   | (1.6)   | -10.8   | (1.6)   | -12.0   | (0.3)  | -12.0   | (0.3)  |
| O.06  | 27.4  | 27.4      | (0.0)  | 27.5    | (0.1)  | 22.3    | (-5.1)  | 22.4    | (-5.0)  | 29.9    | (2.5)  | 29.9    | (2.5)  |
| O.07  | 58.8  | 65.7      | (6.9)  | 65.8    | (7.0)  | 69.4    | (10.6)  | 69.6    | (10.8)  | 64.0    | (5.2)  | 64.1    | (5.3)  |
| O.08  | 19.6  | 21.4      | (1.8)  | 21.6    | (1.9)  | 23.4    | (3.8)   | 23.9    | (4.2)   | 19.4    | (-0.3) | 19.7    | (0.0)  |
| O.09  | -11.5 | -12.2     | (-0.7) | -12.0   | (-0.5) | -12.5   | (-1.0)  | -12.0   | (-0.5)  | -11.8   | (-0.2) | -11.5   | (0.1)  |
| F.01  | 26.9  | 26.2      | (-0.7) | 26.4    | (-0.5) | 23.9    | (-3.0)  | 24.3    | (-2.7)  | 26.8    | (-0.2) | 26.9    | (0.0)  |
| F.02  | 1.0   | 1.0       | (0.1)  | 1.0     | (0.1)  | 0.9     | (-0.1)  | 0.9     | (0.0)   | 1.0     | (0.1)  | 1.1     | (0.1)  |
| F.03  | -2.7  | -2.9      | (-0.2) | -2.9    | (-0.2) | -3.1    | (-0.4)  | -3.1    | (-0.4)  | -2.9    | (-0.2) | -2.8    | (-0.1) |
| Si.01 | 6.4   | 6.7       | (0.2)  | 6.6     | (0.1)  | 8.6     | (2.1)   | 8.3     | (1.9)   | 2.3     | (-4.1) | 2.2     | (-4.3) |
| Si.02 | -10.1 | -10.4     | (-0.3) | -10.4   | (-0.4) | -8.7    | (1.3)   | -8.8    | (1.2)   | -12.9   | (-2.9) | -13.0   | (-2.9) |
| Si.03 | -3.9  | -5.8      | (-1.9) | -5.4    | (-1.5) | -6.1    | (-2.2)  | -5.0    | (-1.1)  | 1.0     | (4.8)  | 1.6     | (5.4)  |
| Si.04 | 28.2  | 28.2      | (0.0)  | 28.3    | (0.1)  | 26.8    | (-1.4)  | 27.0    | (-1.3)  | 28.0    | (-0.2) | 28.0    | (-0.2) |

| rect  | ref.  | B2GP-PLYP |        |         |        | B3LYP   |        |         |        | PBE0    |        |         |        |
|-------|-------|-----------|--------|---------|--------|---------|--------|---------|--------|---------|--------|---------|--------|
|       |       | with D3   |        | without |        | with D3 |        | without |        | with D3 |        | without |        |
| Si.05 | 33.4  | 32.7      | (-0.7) | 33.4    | (-0.1) | 31.3    | (-2.1) | 32.4    | (-1.0) | 32.4    | (-1.0) | 32.9    | (-0.6) |
| Si.06 | 21.5  | 19.6      | (-1.9) | 19.6    | (-1.9) | 14.3    | (-7.2) | 14.0    | (-7.4) | 22.6    | (1.1)  | 22.3    | (0.9)  |
| Si.07 | 28.9  | 34.4      | (5.5)  | 34.5    | (5.7)  | 39.6    | (10.7) | 40.0    | (11.1) | 30.3    | (1.4)  | 30.5    | (1.7)  |
| Si.08 | 22.0  | 23.4      | (1.4)  | 23.3    | (1.4)  | 20.1    | (-1.9) | 19.9    | (-2.1) | 18.3    | (-3.7) | 18.1    | (-3.9) |
| Si.09 | -4.5  | -7.3      | (-2.8) | -7.3    | (-2.8) | -9.3    | (-4.8) | -9.4    | (-4.9) | -10.5   | (-6.0) | -10.6   | (-6.1) |
| Si.10 | 153.7 | 155.1     | (1.4)  | 155.2   | (1.5)  | 149.5   | (-4.2) | 149.8   | (-3.9) | 146.7   | (-7.1) | 146.8   | (-6.9) |
| P.01  | -4.9  | -4.8      | (0.2)  | -4.9    | (0.1)  | -2.2    | (2.8)  | -2.5    | (2.5)  | -7.9    | (-2.9) | -8.1    | (-3.1) |
| P.02  | -1.7  | -2.0      | (-0.2) | -2.1    | (-0.4) | -0.1    | (1.6)  | -0.4    | (1.3)  | -5.2    | (-3.4) | -5.3    | (-3.6) |
| P.03  | 23.0  | 21.8      | (-1.2) | 22.1    | (-0.8) | 19.4    | (-3.5) | 20.4    | (-2.5) | 22.1    | (-0.8) | 22.8    | (-0.2) |
| P.04  | 26.1  | 26.2      | (0.0)  | 26.2    | (0.1)  | 24.7    | (-1.5) | 24.8    | (-1.4) | 25.6    | (-0.6) | 25.6    | (-0.5) |
| P.05  | 10.8  | 10.8      | (0.0)  | 11.1    | (0.3)  | 9.6     | (-1.2) | 10.3    | (-0.5) | 10.3    | (-0.5) | 10.6    | (-0.1) |
| P.06  | 6.6   | 7.1       | (0.5)  | 7.1     | (0.5)  | -0.3    | (-7.0) | -0.3    | (-6.9) | 10.1    | (3.5)  | 10.1    | (3.5)  |
| P.07  | 35.3  | 41.7      | (6.4)  | 41.7    | (6.4)  | 47.4    | (12.1) | 47.5    | (12.2) | 39.1    | (3.8)  | 39.1    | (3.8)  |
| P.08  | -3.9  | -3.1      | (0.8)  | -3.1    | (0.7)  | -5.8    | (-1.9) | -5.8    | (-2.0) | -6.4    | (-2.5) | -6.4    | (-2.5) |
| P.09  | 17.9  | 15.0      | (-2.9) | 15.7    | (-2.2) | 9.8     | (-8.1) | 11.3    | (-6.6) | 16.8    | (-1.1) | 17.5    | (-0.3) |
| P.10  | 33.2  | 33.7      | (0.5)  | 33.4    | (0.3)  | 31.0    | (-2.2) | 30.1    | (-3.1) | 32.9    | (-0.2) | 32.3    | (-0.8) |
| S.01  | -2.6  | -2.5      | (0.1)  | -2.5    | (0.1)  | 0.4     | (2.9)  | 0.2     | (2.8)  | -4.7    | (-2.1) | -4.9    | (-2.3) |
| S.02  | -0.9  | -0.9      | (0.0)  | -1.0    | (-0.1) | 1.2     | (2.1)  | 0.9     | (1.8)  | -4.0    | (-3.1) | -4.2    | (-3.3) |
| S.03  | 6.6   | 7.7       | (1.1)  | 7.9     | (1.4)  | 8.4     | (1.8)  | 8.9     | (2.3)  | 8.4     | (1.8)  | 8.6     | (2.1)  |
| S.04  | 19.8  | 19.7      | (-0.1) | 19.9    | (0.2)  | 18.3    | (-1.4) | 18.8    | (-0.9) | 19.1    | (-0.7) | 19.4    | (-0.4) |
| S.05  | -1.2  | -1.0      | (0.2)  | -0.8    | (0.4)  | -1.1    | (0.1)  | -0.6    | (0.5)  | -0.9    | (0.3)  | -0.7    | (0.5)  |
| S.06  | 35.5  | 35.6      | (0.1)  | 35.5    | (0.1)  | 28.1    | (-7.3) | 27.9    | (-7.6) | 37.2    | (1.8)  | 37.1    | (1.6)  |
| S.07  | 47.1  | 54.3      | (7.2)  | 54.2    | (7.1)  | 59.7    | (12.6) | 59.6    | (12.5) | 52.5    | (5.5)  | 52.5    | (5.4)  |
| S.08  | 11.9  | 13.8      | (1.9)  | 14.0    | (2.1)  | 16.5    | (4.6)  | 17.1    | (5.2)  | 11.6    | (-0.3) | 11.9    | (0.0)  |
| S.09  | -3.0  | -3.2      | (-0.2) | -3.0    | (0.0)  | -3.0    | (0.0)  | -2.5    | (0.6)  | -2.6    | (0.4)  | -2.3    | (0.7)  |
| S.10  | -15.2 | -11.4     | (3.8)  | -10.6   | (4.6)  | -13.9   | (1.3)  | -11.9   | (3.3)  | -12.3   | (2.9)  | -11.3   | (3.9)  |
| Cl.01 | -3.3  | -3.6      | (-0.3) | -3.6    | (-0.3) | -4.7    | (-1.4) | -4.6    | (-1.4) | -3.9    | (-0.6) | -3.8    | (-0.6) |
| Cl.02 | 0.6   | 0.6       | (0.0)  | 0.6     | (0.1)  | 0.2     | (-0.4) | 0.3     | (-0.3) | 0.5     | (-0.1) | 0.6     | (0.0)  |
| Cl.03 | -1.6  | -1.9      | (-0.2) | -1.8    | (-0.2) | -2.5    | (-0.8) | -2.4    | (-0.7) | -2.0    | (-0.4) | -2.0    | (-0.3) |
| Ge.01 | 8.0   | 8.3       | (0.3)  | 8.2     | (0.2)  | 10.6    | (2.6)  | 10.4    | (2.3)  | 5.0     | (-3.1) | 4.8     | (-3.2) |
| Ge.02 | -7.4  | -7.6      | (-0.2) | -7.7    | (-0.3) | -6.0    | (1.4)  | -6.2    | (1.2)  | -10.2   | (-2.8) | -10.3   | (-2.9) |
| Ge.03 | 14.2  | 14.0      | (-0.3) | 14.3    | (0.1)  | 13.1    | (-1.2) | 14.0    | (-0.2) | 16.5    | (2.3)  | 17.1    | (2.9)  |
| Ge.04 | 26.7  | 26.5      | (-0.2) | 26.6    | (-0.1) | 25.0    | (-1.8) | 25.2    | (-1.5) | 25.8    | (-1.0) | 25.9    | (-0.9) |
| Ge.05 | 24.6  | 23.6      | (-1.1) | 24.3    | (-0.3) | 21.6    | (-3.0) | 23.0    | (-1.6) | 22.1    | (-2.5) | 22.7    | (-1.9) |
| Ge.06 | 19.7  | 17.7      | (-1.9) | 17.7    | (-2.0) | 12.2    | (-7.5) | 11.9    | (-7.8) | 20.0    | (0.4)  | 19.8    | (0.1)  |
| Ge.07 | 30.7  | 36.0      | (5.3)  | 36.1    | (5.4)  | 40.9    | (10.2) | 41.1    | (10.4) | 32.8    | (2.1)  | 33.0    | (2.3)  |
| Ge.08 | 19.1  | 20.4      | (1.3)  | 20.3    | (1.2)  | 17.6    | (-1.5) | 17.3    | (-1.7) | 16.3    | (-2.8) | 16.2    | (-2.9) |
| Ge.09 | -2.3  | -3.8      | (-1.5) | -3.9    | (-1.5) | -6.1    | (-3.8) | -6.2    | (-3.9) | -8.2    | (-5.9) | -8.2    | (-5.9) |
| Ge.10 | 93.5  | 93.9      | (0.4)  | 94.1    | (0.6)  | 89.0    | (-4.4) | 89.7    | (-3.8) | 87.0    | (-6.5) | 87.4    | (-6.1) |

| rct               | ref.  | B2GP-PLYP |        |         |        | B3LYP   |        |         |        | PBE0    |        |         |        |
|-------------------|-------|-----------|--------|---------|--------|---------|--------|---------|--------|---------|--------|---------|--------|
|                   |       | with D3   |        | without |        | with D3 |        | without |        | with D3 |        | without |        |
| As.01             | -7.9  | -8.1      | (-0.2) | -8.2    | (-0.3) | -5.4    | (2.5)  | -5.8    | (2.1)  | -10.2   | (-2.3) | -10.4   | (-2.5) |
| As.02             | -5.7  | -6.3      | (-0.6) | -6.4    | (-0.7) | -4.8    | (1.0)  | -5.1    | (0.6)  | -9.0    | (-3.3) | -9.2    | (-3.5) |
| As.03             | 38.7  | 38.7      | (0.1)  | 39.1    | (0.4)  | 36.0    | (-2.7) | 37.1    | (-1.6) | 37.4    | (-1.3) | 38.1    | (-0.6) |
| As.04             | 27.2  | 27.2      | (-0.1) | 27.3    | (0.0)  | 25.5    | (-1.7) | 25.7    | (-1.5) | 26.1    | (-1.2) | 26.1    | (-1.1) |
| As.05             | 9.8   | 9.5       | (-0.3) | 9.9     | (0.2)  | 8.1     | (-1.7) | 9.1     | (-0.7) | 8.2     | (-1.6) | 8.7     | (-1.0) |
| As.06             | -4.8  | -4.9      | (-0.1) | -4.9    | (-0.1) | -13.2   | (-8.5) | -13.2   | (-8.4) | -2.5    | (2.3)  | -2.5    | (2.3)  |
| As.07             | 33.0  | 38.9      | (5.9)  | 39.0    | (5.9)  | 44.3    | (11.3) | 44.4    | (11.4) | 36.9    | (3.8)  | 36.9    | (3.9)  |
| As.08             | -4.2  | -3.6      | (0.6)  | -3.7    | (0.5)  | -5.8    | (-1.6) | -6.0    | (-1.8) | -6.3    | (-2.1) | -6.4    | (-2.2) |
| As.09             | -3.1  | -5.1      | (-2.0) | -4.9    | (-1.8) | -7.9    | (-4.8) | -7.4    | (-4.3) | -6.6    | (-3.5) | -6.3    | (-3.2) |
| As.10             | -2.9  | -4.0      | (-1.1) | -4.1    | (-1.2) | -7.0    | (-4.1) | -7.4    | (-4.5) | -4.0    | (-1.1) | -4.4    | (-1.5) |
| Se.01             | -6.8  | -6.9      | (-0.2) | -7.0    | (-0.2) | -3.9    | (2.8)  | -4.2    | (2.6)  | -8.3    | (-1.5) | -8.4    | (-1.7) |
| Se.02             | -5.1  | -5.4      | (-0.2) | -5.5    | (-0.4) | -3.6    | (1.5)  | -4.0    | (1.2)  | -8.0    | (-2.8) | -8.2    | (-3.0) |
| Se.03             | 16.0  | 17.0      | (1.0)  | 17.3    | (1.3)  | 17.5    | (1.6)  | 18.2    | (2.2)  | 17.1    | (1.1)  | 17.4    | (1.4)  |
| Se.04             | 20.8  | 20.6      | (-0.2) | 20.9    | (0.1)  | 19.0    | (-1.8) | 19.6    | (-1.2) | 19.5    | (-1.3) | 19.8    | (-1.0) |
| Se.05             | 0.0   | 0.0       | (0.0)  | 0.3     | (0.2)  | -0.2    | (-0.3) | 0.3     | (0.3)  | -0.3    | (-0.4) | 0.0     | (0.0)  |
| Se.06             | 32.8  | 32.6      | (-0.2) | 32.5    | (-0.3) | 25.1    | (-7.8) | 24.7    | (-8.2) | 33.7    | (0.9)  | 33.5    | (0.6)  |
| Se.07             | 43.4  | 50.1      | (6.7)  | 50.0    | (6.7)  | 55.3    | (12.0) | 55.2    | (11.9) | 48.8    | (5.5)  | 48.7    | (5.3)  |
| Se.08             | 10.7  | 12.6      | (1.8)  | 12.8    | (2.1)  | 15.3    | (4.6)  | 16.0    | (5.3)  | 10.3    | (-0.4) | 10.7    | (0.0)  |
| Se.09             | -2.9  | -3.2      | (-0.3) | -3.0    | (-0.1) | -2.5    | (0.4)  | -1.9    | (0.9)  | -2.3    | (0.6)  | -2.0    | (0.9)  |
| Se.10             | -68.9 | -67.0     | (1.9)  | -66.6   | (2.3)  | -67.8   | (1.0)  | -66.9   | (2.0)  | -69.7   | (-0.9) | -69.2   | (-0.4) |
| Br.01             | -6.3  | -6.4      | (-0.1) | -6.3    | (-0.1) | -7.8    | (-1.5) | -7.7    | (-1.4) | -7.1    | (-0.8) | -7.0    | (-0.7) |
| Br.02             | 0.1   | 0.0       | (-0.1) | 0.0     | (0.0)  | -0.6    | (-0.7) | -0.5    | (-0.5) | -0.1    | (-0.2) | -0.1    | (-0.1) |
| Br.03             | -1.6  | -1.8      | (-0.2) | -1.9    | (-0.2) | -2.5    | (-0.9) | -2.5    | (-0.9) | -2.1    | (-0.5) | -2.1    | (-0.4) |
| $\bar{X}$         |       |           | 0.5    |         | 0.6    |         | 0.0    |         | 0.2    |         | -0.5   |         | -0.5   |
| $\overline{ X }$  |       |           | 1.3    |         | 1.3    |         | 3.5    |         | 3.5    |         | 2.0    |         | 2.0    |
| $\widetilde{ X }$ |       |           | 0.4    |         | 0.4    |         | 2.0    |         | 2.0    |         | 1.7    |         | 1.7    |
| $x_{\max}$        |       |           | 7.8    |         | 7.9    |         | 12.6   |         | 13.0   |         | 6.0    |         | 6.2    |
| $x_{\min}$        |       |           | -4.6   |         | -4.1   |         | -11.7  |         | -10.6  |         | -7.1   |         | -6.9   |



Table 9: Reference isomerization energies based on RI-SCS-MP2(pFC)/cc-p(wC)V5Z computations with CCSD(T)(pFC)/cc-p(wC)TZ corrections for higher correlation contributions in comarison to density functionals with and without dispersion correction (same basis set). Deviations are given in parentheses. The mean deviation ( $\bar{x}$ ), the mean absolute deviation ( $\overline{|x|}$ ), the median of the absolute deviation ( $\widetilde{|x|}$ ), the maximum ( $x_{\max}$ ) and minimum deviation ( $x_{\min}$ ) are given at the end. All values in kcal mol<sup>-1</sup>.

| rct   | ref.  | PW6B95  |        |         |        | oTPSS   |        |         |        | $\omega$ B97X-D |        |         |        |
|-------|-------|---------|--------|---------|--------|---------|--------|---------|--------|-----------------|--------|---------|--------|
|       |       | with D3 |        | without |        | with D3 |        | without |        | with D3         |        | without |        |
| C.01  | 5.9   | 3.3     | (-2.6) | 3.3     | (-2.6) | 3.6     | (-2.3) | 3.5     | (-2.4) | 2.3             | (-3.6) | 2.2     | (-3.7) |
| C.04  | 17.7  | 16.5    | (-1.2) | 16.5    | (-1.2) | 15.3    | (-2.4) | 15.2    | (-2.5) | 16.8            | (-0.9) | 16.8    | (-0.9) |
| C.05  | 3.8   | 2.5     | (-1.2) | 1.8     | (-1.9) | 2.4     | (-1.4) | 0.7     | (-3.1) | 3.2             | (-0.5) | 2.6     | (-1.2) |
| C.06  | 18.9  | 17.9    | (-1.0) | 17.6    | (-1.3) | 15.5    | (-3.4) | 14.4    | (-4.5) | 21.8            | (2.9)  | 21.1    | (2.2)  |
| C.07  | 45.1  | 49.3    | (4.1)  | 49.6    | (4.4)  | 50.7    | (5.5)  | 51.6    | (6.5)  | 48.9            | (3.8)  | 49.2    | (4.0)  |
| C.08  | 1.3   | -1.4    | (-2.7) | -1.4    | (-2.7) | -1.5    | (-2.9) | -1.5    | (-2.9) | -0.3            | (-1.6) | -0.3    | (-1.6) |
| C.10  | -9.1  | -8.4    | (0.7)  | -8.2    | (0.9)  | -8.6    | (0.5)  | -8.1    | (1.0)  | -9.8            | (-0.7) | -9.6    | (-0.5) |
| N.01  | 16.6  | 15.8    | (-0.9) | 15.7    | (-1.0) | 17.0    | (0.4)  | 16.8    | (0.2)  | 14.8            | (-1.8) | 14.7    | (-1.9) |
| N.02  | 17.9  | 15.4    | (-2.5) | 15.3    | (-2.6) | 16.5    | (-1.4) | 16.2    | (-1.7) | 15.1            | (-2.8) | 14.9    | (-3.0) |
| N.03  | -20.9 | -22.7   | (-1.8) | -22.5   | (-1.6) | -24.5   | (-3.5) | -23.9   | (-3.0) | -21.6           | (-0.7) | -21.5   | (-0.5) |
| N.04  | 12.3  | 11.4    | (-0.9) | 11.5    | (-0.8) | 10.0    | (-2.3) | 10.0    | (-2.3) | 11.4            | (-0.9) | 11.3    | (-1.0) |
| N.05  | -12.0 | -11.2   | (0.8)  | -11.2   | (0.8)  | -12.4   | (-0.4) | -12.4   | (-0.4) | -11.7           | (0.3)  | -11.7   | (0.3)  |
| N.06  | 32.0  | 31.7    | (-0.4) | 31.6    | (-0.4) | 28.1    | (-4.0) | 27.4    | (-4.6) | 35.7            | (3.7)  | 35.2    | (3.2)  |
| N.07  | 57.1  | 62.8    | (5.7)  | 63.0    | (5.8)  | 65.2    | (8.1)  | 65.9    | (8.7)  | 62.1            | (4.9)  | 62.2    | (5.1)  |
| N.08  | -14.2 | -16.5   | (-2.4) | -16.5   | (-2.4) | -18.2   | (-4.0) | -18.2   | (-4.0) | -15.6           | (-1.4) | -15.6   | (-1.4) |
| N.09  | -31.8 | -35.0   | (-3.2) | -34.3   | (-2.6) | -40.2   | (-8.5) | -39.2   | (-7.4) | -35.4           | (-3.6) | -35.2   | (-3.4) |
| O.01  | 15.8  | 13.6    | (-2.1) | 13.7    | (-2.1) | 14.2    | (-1.5) | 14.2    | (-1.5) | 13.4            | (-2.3) | 13.3    | (-2.4) |
| O.02  | 25.2  | 23.1    | (-2.1) | 23.0    | (-2.2) | 24.0    | (-1.2) | 23.9    | (-1.3) | 23.9            | (-1.3) | 23.7    | (-1.5) |
| O.03  | -63.7 | -61.2   | (2.5)  | -61.0   | (2.7)  | -60.5   | (3.2)  | -59.9   | (3.8)  | -62.4           | (1.3)  | -62.3   | (1.4)  |
| O.04  | 9.9   | 9.7     | (-0.2) | 9.8     | (-0.1) | 8.0     | (-1.9) | 8.2     | (-1.7) | 9.1             | (-0.8) | 9.2     | (-0.7) |
| O.05  | -12.4 | -11.1   | (1.3)  | -11.1   | (1.3)  | -11.8   | (0.5)  | -11.7   | (0.6)  | -11.9           | (0.4)  | -11.8   | (0.5)  |
| O.06  | 27.4  | 27.8    | (0.4)  | 27.9    | (0.5)  | 24.6    | (-2.8) | 24.5    | (-2.9) | 31.3            | (3.9)  | 31.0    | (3.6)  |
| O.07  | 58.8  | 63.1    | (4.3)  | 63.2    | (4.4)  | 65.5    | (6.7)  | 65.8    | (7.0)  | 62.8            | (4.0)  | 62.9    | (4.1)  |
| O.08  | 19.6  | 20.6    | (0.9)  | 20.8    | (1.1)  | 24.8    | (5.2)  | 25.4    | (5.7)  | 20.8            | (1.2)  | 21.1    | (1.4)  |
| O.09  | -11.5 | -11.6   | (0.0)  | -11.3   | (0.2)  | -12.2   | (-0.7) | -11.6   | (-0.1) | -13.2           | (-1.7) | -13.1   | (-1.6) |
| F.01  | 26.9  | 25.6    | (-1.3) | 25.8    | (-1.1) | 24.9    | (-2.0) | 25.2    | (-1.7) | 26.9            | (-0.1) | 26.8    | (-0.1) |
| F.02  | 1.0   | 1.0     | (0.0)  | 1.0     | (0.0)  | 1.1     | (0.1)  | 1.2     | (0.2)  | 0.9             | (-0.1) | 1.0     | (0.0)  |
| F.03  | -2.7  | -2.8    | (-0.2) | -2.8    | (-0.1) | -3.0    | (-0.4) | -2.9    | (-0.3) | -3.0            | (-0.3) | -2.9    | (-0.3) |
| Si.01 | 6.4   | 4.3     | (-2.1) | 4.2     | (-2.2) | 4.7     | (-1.8) | 4.4     | (-2.0) | 3.6             | (-2.8) | 3.5     | (-2.9) |
| Si.02 | -10.1 | -12.3   | (-2.3) | -12.4   | (-2.3) | -11.4   | (-1.3) | -11.5   | (-1.4) | -13.8           | (-3.8) | -13.9   | (-3.8) |
| Si.03 | -3.9  | -2.5    | (1.4)  | -2.0    | (1.9)  | -1.4    | (2.5)  | -0.3    | (3.6)  | -3.6            | (0.3)  | -3.2    | (0.6)  |
| Si.04 | 28.2  | 27.1    | (-1.1) | 27.2    | (-1.0) | 26.2    | (-2.0) | 26.3    | (-1.9) | 27.2            | (-1.0) | 27.2    | (-1.0) |

| rct   | ref.  | PW6B95  |        |         |        | oTPSS   |        |         |        | $\omega$ B97X-D |        |         |        |
|-------|-------|---------|--------|---------|--------|---------|--------|---------|--------|-----------------|--------|---------|--------|
|       |       | with D3 |        | without |        | with D3 |        | without |        | with D3         |        | without |        |
| Si.05 | 33.4  | 32.6    | (-0.8) | 33.2    | (-0.2) | 35.4    | (2.0)  | 36.4    | (3.0)  | 32.8            | (-0.6) | 32.5    | (-1.0) |
| Si.06 | 21.5  | 19.9    | (-1.6) | 19.8    | (-1.7) | 17.2    | (-4.2) | 16.8    | (-4.7) | 23.0            | (1.5)  | 22.6    | (1.1)  |
| Si.07 | 28.9  | 30.8    | (1.9)  | 30.9    | (2.0)  | 32.7    | (3.8)  | 33.2    | (4.3)  | 31.6            | (2.7)  | 31.8    | (2.9)  |
| Si.08 | 22.0  | 19.9    | (-2.1) | 19.8    | (-2.2) | 19.7    | (-2.3) | 19.5    | (-2.5) | 21.6            | (-0.4) | 21.6    | (-0.4) |
| Si.09 | -4.5  | -10.0   | (-5.5) | -10.0   | (-5.5) | -7.5    | (-3.0) | -7.6    | (-3.1) | -12.7           | (-8.2) | -12.8   | (-8.3) |
| Si.10 | 153.7 | 150.1   | (-3.6) | 150.2   | (-3.5) | 149.7   | (-4.0) | 150.0   | (-3.8) | 147.2           | (-6.5) | 147.2   | (-6.5) |
| P.01  | -4.9  | -6.6    | (-1.7) | -6.8    | (-1.8) | -5.8    | (-0.9) | -6.1    | (-1.2) | -7.0            | (-2.1) | -7.1    | (-2.2) |
| P.02  | -1.7  | -4.4    | (-2.6) | -4.5    | (-2.8) | -3.5    | (-1.8) | -3.9    | (-2.1) | -5.2            | (-3.5) | -5.3    | (-3.6) |
| P.03  | 23.0  | 21.3    | (-1.6) | 21.8    | (-1.2) | 20.8    | (-2.1) | 21.9    | (-1.0) | 20.2            | (-2.8) | 20.6    | (-2.3) |
| P.04  | 26.1  | 24.9    | (-1.3) | 24.9    | (-1.2) | 23.7    | (-2.4) | 23.8    | (-2.4) | 24.9            | (-1.3) | 24.9    | (-1.3) |
| P.05  | 10.8  | 10.6    | (-0.1) | 11.0    | (0.2)  | 10.9    | (0.1)  | 11.6    | (0.9)  | 10.5            | (-0.3) | 10.5    | (-0.2) |
| P.06  | 6.6   | 6.7     | (0.1)  | 6.8     | (0.1)  | 6.0     | (-0.6) | 5.9     | (-0.7) | 8.9             | (2.3)  | 8.8     | (2.1)  |
| P.07  | 35.3  | 39.1    | (3.8)  | 39.1    | (3.8)  | 41.6    | (6.3)  | 41.9    | (6.6)  | 39.5            | (4.2)  | 39.5    | (4.2)  |
| P.08  | -3.9  | -5.6    | (-1.8) | -5.7    | (-1.8) | -6.0    | (-2.1) | -6.0    | (-2.1) | -4.0            | (-0.1) | -4.0    | (-0.1) |
| P.09  | 17.9  | 16.1    | (-1.8) | 16.8    | (-1.0) | 13.0    | (-4.9) | 14.5    | (-3.4) | 18.3            | (0.4)  | 18.8    | (0.9)  |
| P.10  | 33.2  | 31.3    | (-1.8) | 31.0    | (-2.2) | 35.6    | (2.4)  | 34.3    | (1.2)  | 33.4            | (0.2)  | 32.8    | (-0.4) |
| S.01  | -2.6  | -4.0    | (-1.5) | -4.1    | (-1.5) | -2.7    | (-0.1) | -3.0    | (-0.4) | -4.3            | (-1.7) | -4.5    | (-1.9) |
| S.02  | -0.9  | -3.4    | (-2.5) | -3.5    | (-2.6) | -2.2    | (-1.3) | -2.6    | (-1.7) | -3.6            | (-2.6) | -3.8    | (-2.8) |
| S.03  | 6.6   | 9.0     | (2.4)  | 9.3     | (2.7)  | 9.0     | (2.5)  | 9.5     | (2.9)  | 7.2             | (0.6)  | 7.2     | (0.6)  |
| S.04  | 19.8  | 18.6    | (-1.2) | 18.9    | (-0.9) | 17.0    | (-2.8) | 17.4    | (-2.3) | 18.3            | (-1.4) | 18.4    | (-1.4) |
| S.05  | -1.2  | -0.6    | (0.5)  | -0.4    | (0.8)  | -0.8    | (0.3)  | -0.4    | (0.8)  | -1.0            | (0.2)  | -0.9    | (0.2)  |
| S.06  | 35.5  | 34.4    | (-1.0) | 34.4    | (-1.1) | 31.5    | (-3.9) | 31.1    | (-4.4) | 37.6            | (2.2)  | 37.3    | (1.9)  |
| S.07  | 47.1  | 52.1    | (5.0)  | 52.0    | (5.0)  | 55.1    | (8.0)  | 55.2    | (8.1)  | 51.9            | (4.9)  | 51.9    | (4.9)  |
| S.08  | 11.9  | 13.0    | (1.2)  | 13.3    | (1.4)  | 17.9    | (6.0)  | 18.6    | (6.7)  | 12.5            | (0.6)  | 12.7    | (0.9)  |
| S.09  | -3.0  | -2.4    | (0.7)  | -2.1    | (0.9)  | -2.6    | (0.4)  | -2.1    | (0.9)  | -2.9            | (0.1)  | -2.8    | (0.3)  |
| S.10  | -15.2 | -11.8   | (3.4)  | -10.9   | (4.3)  | -7.1    | (8.1)  | -5.1    | (10.1) | -11.3           | (3.9)  | -11.0   | (4.2)  |
| Cl.01 | -3.3  | -3.9    | (-0.6) | -3.8    | (-0.5) | -3.7    | (-0.4) | -3.7    | (-0.4) | -4.1            | (-0.8) | -4.2    | (-0.9) |
| Cl.02 | 0.6   | 0.6     | (0.0)  | 0.6     | (0.1)  | 0.3     | (-0.3) | 0.5     | (-0.1) | 0.6             | (0.0)  | 0.7     | (0.1)  |
| Cl.03 | -1.6  | -1.8    | (-0.1) | -1.8    | (-0.1) | -2.4    | (-0.7) | -2.2    | (-0.6) | -2.0            | (-0.4) | -1.9    | (-0.3) |
| Ge.01 | 8.0   | 6.6     | (-1.4) | 6.5     | (-1.5) | 7.2     | (-0.8) | 6.9     | (-1.1) | 6.6             | (-1.4) | 6.5     | (-1.5) |
| Ge.02 | -7.4  | -9.8    | (-2.4) | -9.9    | (-2.5) | -8.8    | (-1.4) | -8.9    | (-1.5) | -10.7           | (-3.3) | -10.7   | (-3.4) |
| Ge.03 | 14.2  | 14.6    | (0.4)  | 15.1    | (0.9)  | 12.8    | (-1.4) | 13.9    | (-0.3) | 11.8            | (-2.4) | 12.3    | (-2.0) |
| Ge.04 | 26.7  | 24.9    | (-1.8) | 25.1    | (-1.7) | 24.1    | (-2.7) | 24.3    | (-2.5) | 24.9            | (-1.8) | 24.9    | (-1.8) |
| Ge.05 | 24.6  | 22.6    | (-2.0) | 23.4    | (-1.2) | 25.2    | (0.6)  | 26.7    | (2.0)  | 22.1            | (-2.5) | 22.0    | (-2.6) |
| Ge.06 | 19.7  | 17.3    | (-2.3) | 17.2    | (-2.4) | 15.0    | (-4.6) | 14.6    | (-5.1) | 20.2            | (0.5)  | 19.8    | (0.2)  |
| Ge.07 | 30.7  | 33.0    | (2.4)  | 33.1    | (2.4)  | 34.9    | (4.2)  | 35.3    | (4.7)  | 34.5            | (3.8)  | 34.7    | (4.0)  |
| Ge.08 | 19.1  | 17.8    | (-1.3) | 17.7    | (-1.4) | 17.8    | (-1.3) | 17.5    | (-1.6) | 19.7            | (0.6)  | 19.6    | (0.6)  |
| Ge.09 | -2.3  | -7.6    | (-5.2) | -7.6    | (-5.3) | -5.4    | (-3.1) | -5.5    | (-3.2) | -10.1           | (-7.8) | -10.1   | (-7.8) |
| Ge.10 | 93.5  | 89.4    | (-4.1) | 89.7    | (-3.8) | 92.2    | (-1.3) | 92.8    | (-0.7) | 87.5            | (-5.9) | 87.6    | (-5.9) |

| rect              | ref.  | PW6B95  |        |         |        | oTPSS   |        |         |        | $\omega$ B97X-D |        |         |        |
|-------------------|-------|---------|--------|---------|--------|---------|--------|---------|--------|-----------------|--------|---------|--------|
|                   |       | with D3 |        | without |        | with D3 |        | without |        | with D3         |        | without |        |
| As.01             | -7.9  | -9.2    | (-1.3) | -9.3    | (-1.5) | -7.8    | (0.0)  | -8.2    | (-0.3) | -8.6            | (-0.8) | -8.8    | (-0.9) |
| As.02             | -5.7  | -8.6    | (-2.9) | -8.7    | (-3.0) | -7.2    | (-1.5) | -7.6    | (-1.9) | -8.4            | (-2.7) | -8.5    | (-2.8) |
| As.03             | 38.7  | 37.1    | (-1.6) | 37.5    | (-1.2) | 34.1    | (-4.6) | 35.3    | (-3.4) | 34.4            | (-4.3) | 34.9    | (-3.8) |
| As.04             | 27.2  | 25.5    | (-1.8) | 25.6    | (-1.7) | 24.3    | (-2.9) | 24.4    | (-2.8) | 25.2            | (-2.1) | 25.2    | (-2.0) |
| As.05             | 9.8   | 8.9     | (-0.9) | 9.3     | (-0.4) | 9.7     | (-0.1) | 10.7    | (1.0)  | 8.3             | (-1.5) | 8.4     | (-1.4) |
| As.06             | -4.8  | -6.2    | (-1.4) | -6.2    | (-1.4) | -7.8    | (-3.0) | -7.8    | (-3.0) | -4.4            | (0.4)  | -4.5    | (0.2)  |
| As.07             | 33.0  | 36.6    | (3.6)  | 36.6    | (3.6)  | 39.1    | (6.0)  | 39.3    | (6.2)  | 37.6            | (4.6)  | 37.6    | (4.5)  |
| As.08             | -4.2  | -5.5    | (-1.3) | -5.6    | (-1.4) | -5.5    | (-1.3) | -5.6    | (-1.4) | -3.7            | (0.5)  | -3.7    | (0.5)  |
| As.09             | -3.1  | -6.0    | (-2.9) | -5.8    | (-2.7) | -6.8    | (-3.7) | -6.1    | (-3.0) | -4.8            | (-1.7) | -4.5    | (-1.4) |
| As.10             | -2.9  | -6.2    | (-3.3) | -6.3    | (-3.3) | -1.1    | (1.8)  | -1.7    | (1.2)  | -3.9            | (-1.0) | -4.4    | (-1.5) |
| Se.01             | -6.8  | -7.7    | (-1.0) | -7.8    | (-1.1) | -5.5    | (1.3)  | -5.8    | (1.0)  | -7.4            | (-0.6) | -7.5    | (-0.8) |
| Se.02             | -5.1  | -7.7    | (-2.5) | -7.8    | (-2.7) | -6.0    | (-0.8) | -6.4    | (-1.3) | -7.3            | (-2.2) | -7.5    | (-2.4) |
| Se.03             | 16.0  | 18.0    | (2.0)  | 18.3    | (2.3)  | 17.6    | (1.6)  | 18.3    | (2.3)  | 15.7            | (-0.3) | 15.7    | (-0.3) |
| Se.04             | 20.8  | 19.2    | (-1.7) | 19.5    | (-1.4) | 17.5    | (-3.3) | 18.1    | (-2.8) | 18.6            | (-2.2) | 18.7    | (-2.1) |
| Se.05             | 0.0   | 0.1     | (0.1)  | 0.4     | (0.3)  | 0.1     | (0.1)  | 0.7     | (0.7)  | -0.4            | (-0.4) | -0.3    | (-0.3) |
| Se.06             | 32.8  | 31.0    | (-1.9) | 30.8    | (-2.0) | 28.3    | (-4.6) | 27.7    | (-5.2) | 33.8            | (0.9)  | 33.4    | (0.6)  |
| Se.07             | 43.4  | 48.2    | (4.8)  | 48.1    | (4.7)  | 51.2    | (7.9)  | 51.3    | (7.9)  | 48.6            | (5.3)  | 48.6    | (5.3)  |
| Se.08             | 10.7  | 11.7    | (1.0)  | 12.1    | (1.3)  | 16.6    | (5.9)  | 17.5    | (6.7)  | 11.3            | (0.6)  | 11.6    | (0.9)  |
| Se.09             | -2.9  | -1.8    | (1.0)  | -1.6    | (1.3)  | -1.5    | (1.3)  | -1.0    | (1.9)  | -2.0            | (0.8)  | -1.9    | (1.0)  |
| Se.10             | -68.9 | -68.9   | (0.0)  | -68.5   | (0.4)  | -55.7   | (13.2) | -54.7   | (14.2) | -67.1           | (1.7)  | -67.0   | (1.9)  |
| Br.01             | -6.3  | -6.8    | (-0.6) | -6.7    | (-0.5) | -6.6    | (-0.3) | -6.5    | (-0.2) | -7.3            | (-1.1) | -7.3    | (-1.1) |
| Br.02             | 0.1   | 0.0     | (-0.1) | 0.0     | (-0.1) | -0.4    | (-0.5) | -0.2    | (-0.3) | 0.0             | (0.0)  | 0.2     | (0.1)  |
| Br.03             | -1.6  | -1.8    | (-0.1) | -1.8    | (-0.2) | -2.3    | (-0.6) | -2.2    | (-0.6) | -2.0            | (-0.4) | -1.9    | (-0.3) |
| $\bar{X}$         |       |         | -0.6   |         | -0.5   |         | -0.2   |         | 0.0    |                 | -0.4   |         | -0.5   |
| $ \bar{X} $       |       |         | 1.8    |         | 1.8    |         | 2.7    |         | 2.8    |                 | 1.9    |         | 2.0    |
| $ \widetilde{X} $ |       |         | 1.6    |         | 1.5    |         | 2.1    |         | 2.2    |                 | 1.4    |         | 1.4    |
| $x_{\max}$        |       |         | 5.7    |         | 5.8    |         | 13.2   |         | 14.2   |                 | 5.3    |         | 5.3    |
| $x_{\min}$        |       |         | -5.5   |         | -5.5   |         | -8.5   |         | -7.4   |                 | -8.2   |         | -8.3   |

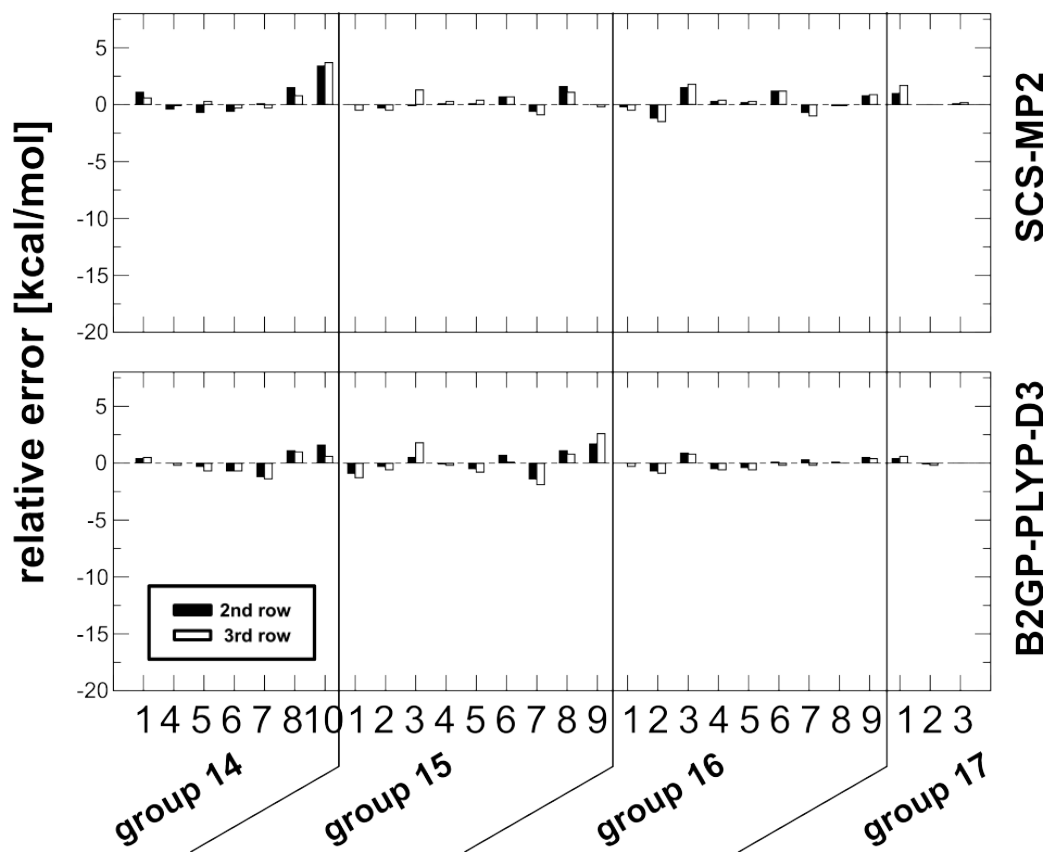

Figure 1: Relative change in deviations with respect to first row results for a given isomerization reaction set plotted for SCS-MP2 and B2GP-PLYP-D3.

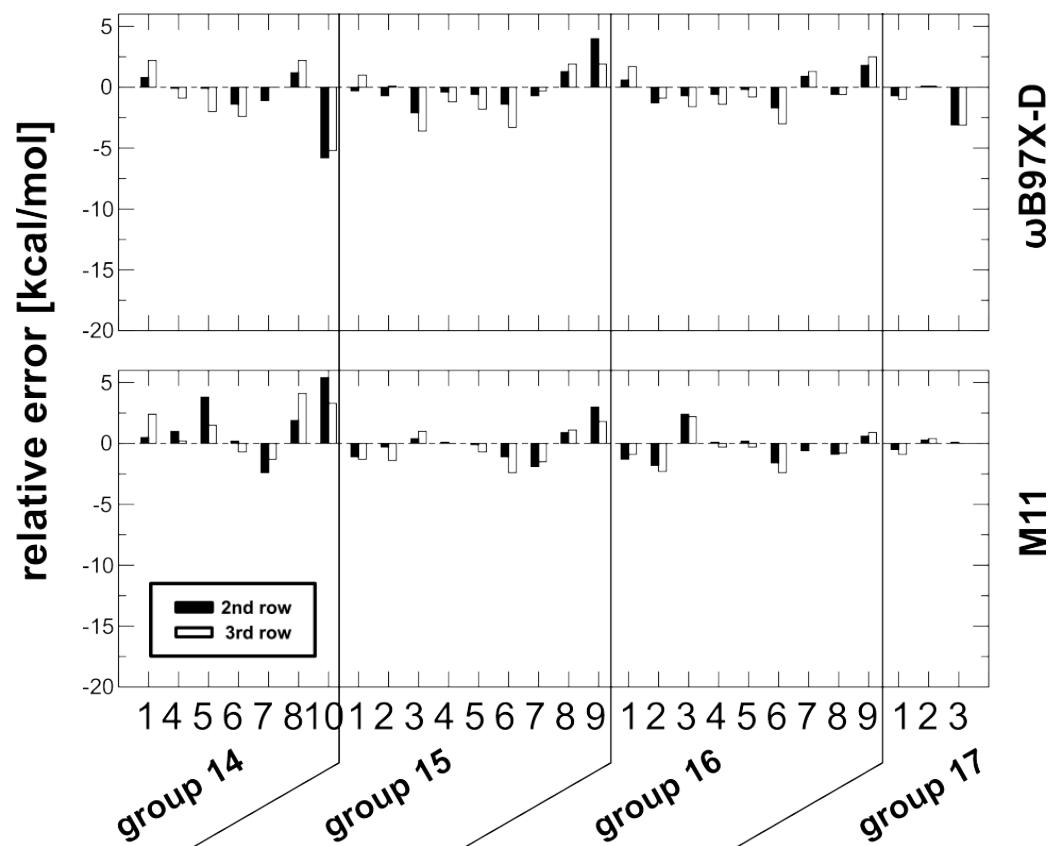

Figure 2: Relative change in deviations with respect to first row results for a given isomerization reaction set plotted for  $\omega$ B97X-D and M11.

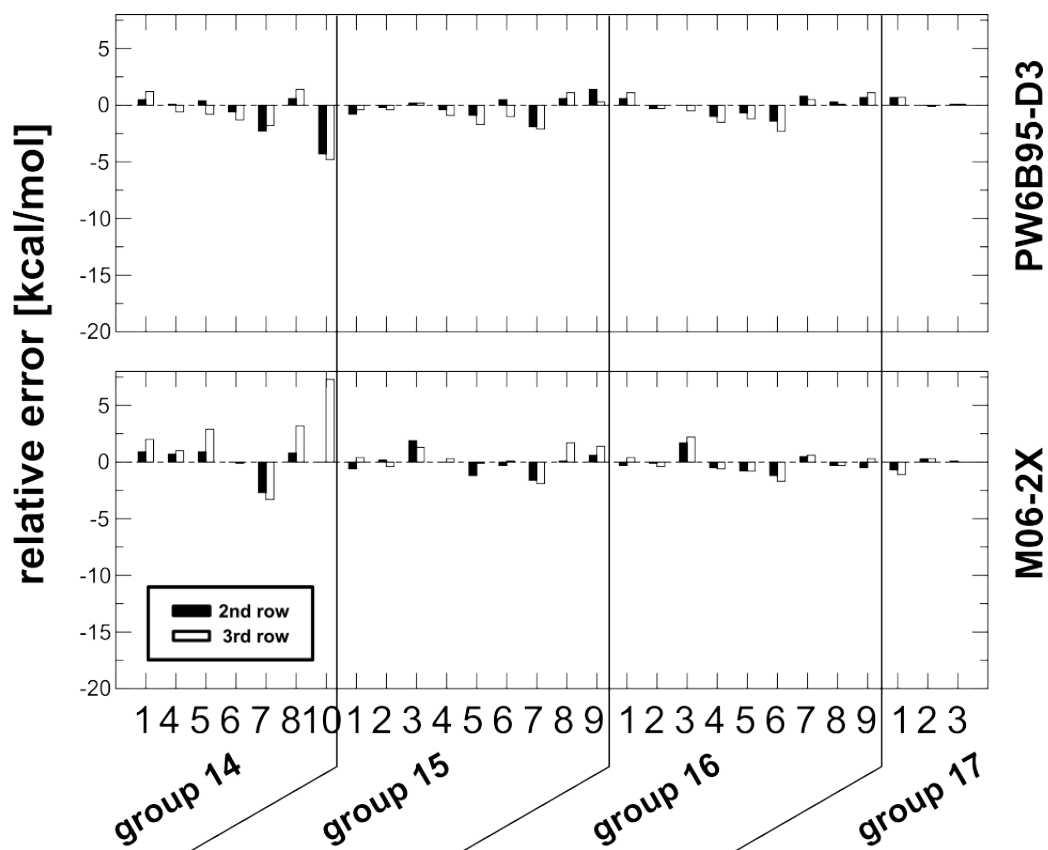

Figure 3: Relative change in deviations with respect to first row results for a given isomerization reaction set plotted for PW6B95-D3 and M06-2X.

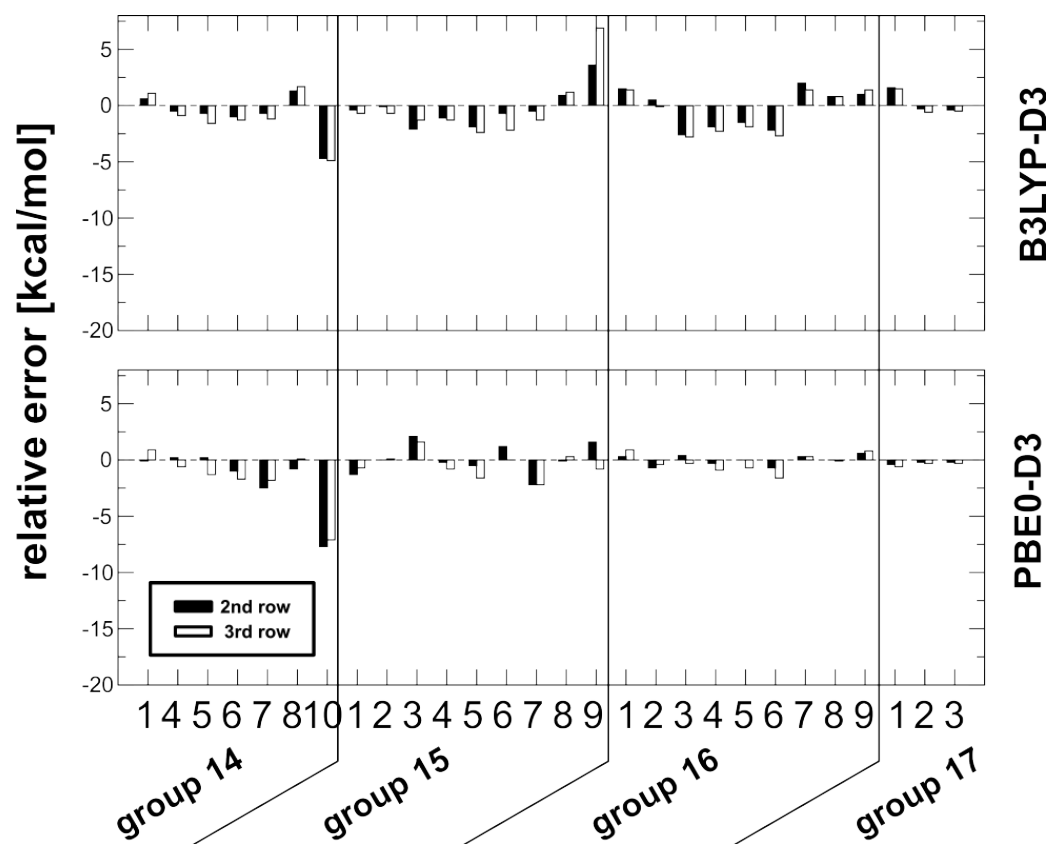

Figure 4: Relative change in deviations with respect to first row results for a given isomerization reaction set plotted for B3LYP-D3 and PBE0-D3.

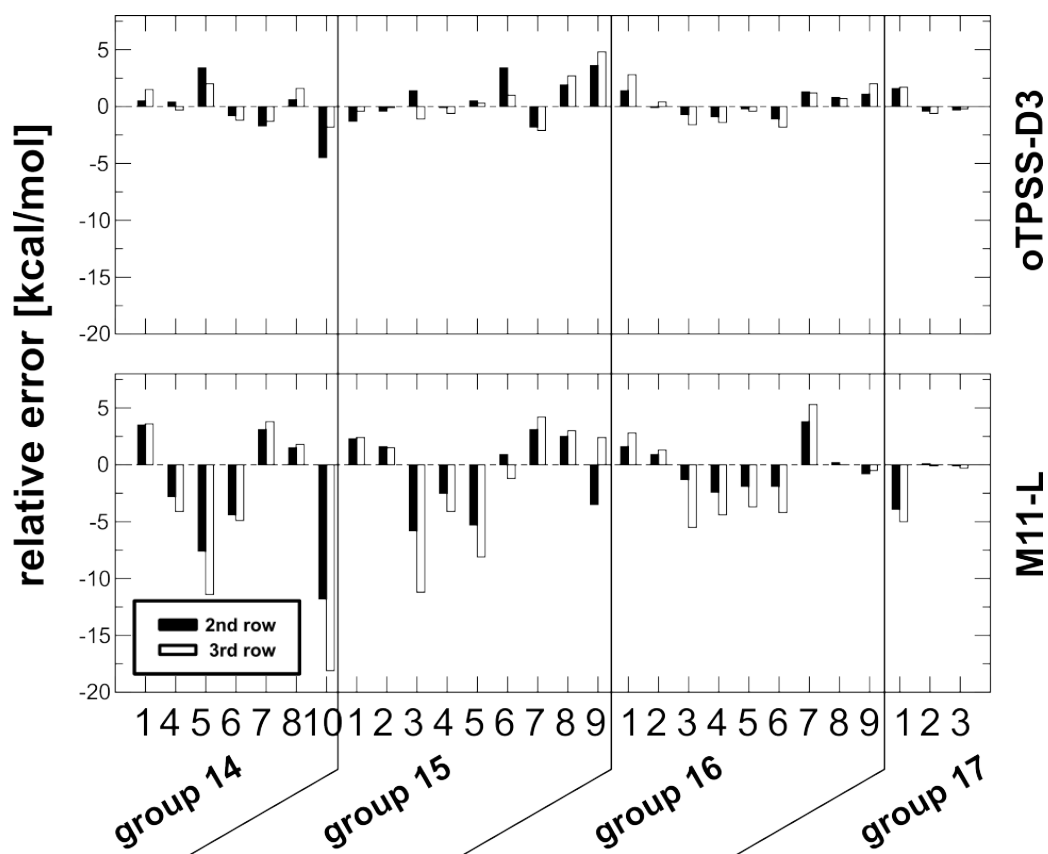

Figure 5: Relative change in deviations with respect to first row results for a given isomerization reaction set plotted for oTPSS-D3 and M11-L.
